# Supplementary material for: Group 11 metal complexes of the dinucleating triazole appended bisphosphine 1,4-bis(5-(diisopropylphosphaneyl)-1-phenyl-1H-1,2,3-triazol-4-yl)benzene
Source: Royal Society of Chemistry journal article supplement (doi:10.1039/d1dt02803k), 2021-01-01
Supplement: d1dt02803k1.pdf [file d1dt02803k1.pdf]

## Supporting Information

### **Group 11 metal complexes of a dinucleating triazole appended bisphosphine, 1,4-bis(5-(diisopropylphosphaneyl)-1-phenyl-1H-1,2,3- triazol-4-yl)benzene**

Basvaraj S. Kote, Harish S. Kunchur, Latchupatula Radhakrishna and Maravanji S. Balakrishna\*

Phosphorus Laboratory, Department of Chemistry, Indian Institute of Technology Bombay, Powai, Mumbai 400076, India

|                                                                         |         |
|-------------------------------------------------------------------------|---------|
| NMR spectra of compounds <b>1a-10</b>                                   | S2-S30  |
| HRMS and FT-IR spectra of compounds <b>2-10</b>                         | S3-S32  |
| Crystallographic information for compounds <b>2-5</b> , and <b>7-10</b> | S33-S34 |
| Computational Details                                                   | S35-S35 |

---

\*Corresponding author: M. S. Balakrishna, E-mail: [krishna@chem.iitb.ac.in](mailto:krishna@chem.iitb.ac.in) or [msb\\_krishna@iitb.ac.in](mailto:msb_krishna@iitb.ac.in)

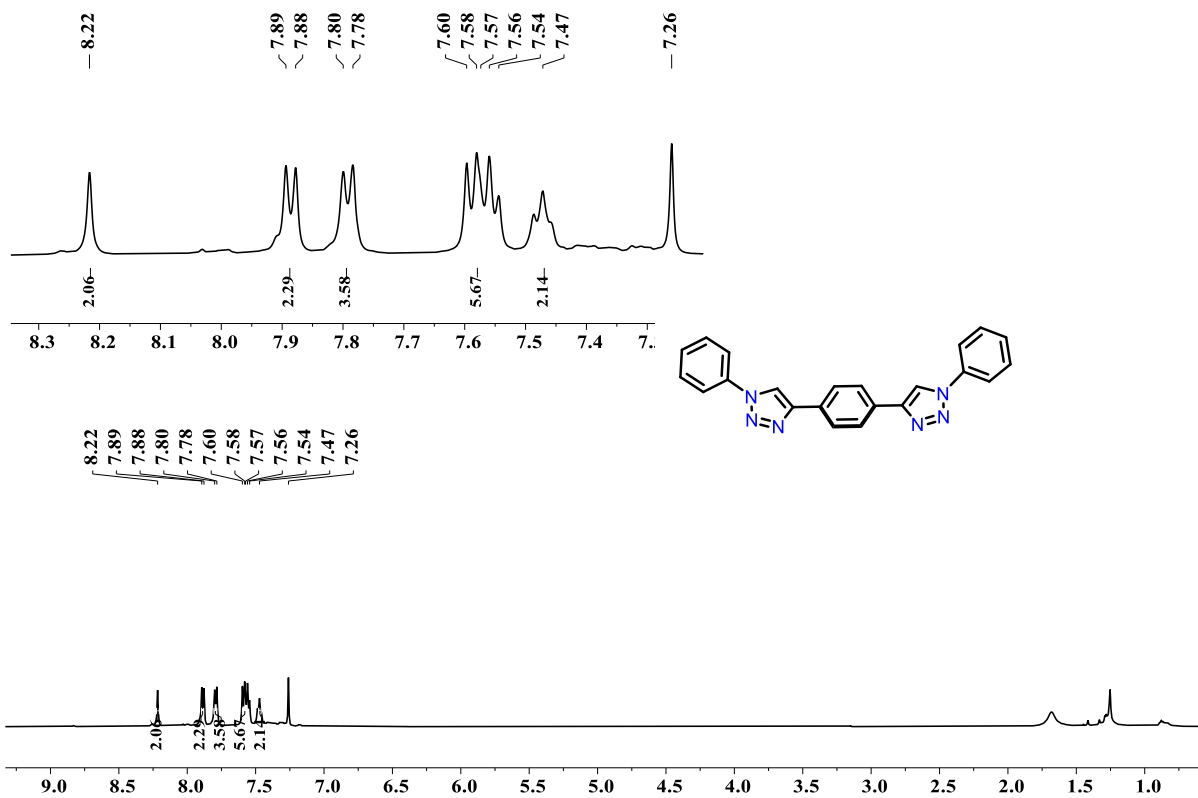

**Fig. S1** <sup>1</sup>H NMR spectrum of **1a** in CDCl<sub>3</sub> (400 MHz).

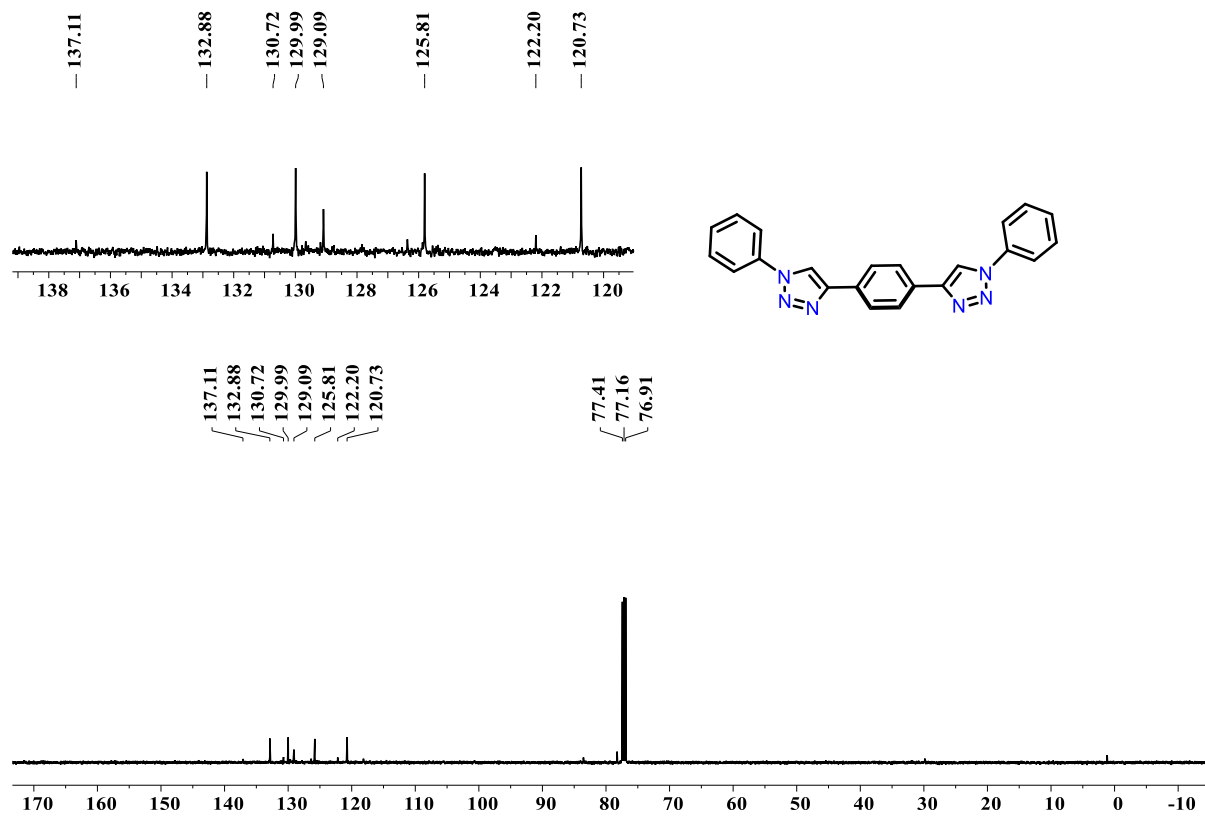

**Fig. S2** <sup>13</sup>C{<sup>1</sup>H} NMR spectrum of **1a** in CDCl<sub>3</sub> (400 MHz).

DEPARTMENT OF CHEMISTRY, I.I.T.(B)

**Analysis Info**

Analysis Name D:\Data\SEP 21\MSB-BK-BISTRIAZOLE.d  
 Method Low\_mass- NAF.m  
 Sample Name MSB-BK-BISTRIAZOLE  
 Comment C22H16N6

Acquisition Date 9/17/2021 9:18:42 PM  
 Operator GKL-OUT  
 Instrument maXis impact 282001.00081

**Acquisition Parameter**

|             |            |                      |          |                  |           |
|-------------|------------|----------------------|----------|------------------|-----------|
| Source Type | ESI        | Ion Polarity         | Positive | Set Nebulizer    | 0.3 Bar   |
| Focus       | Not active | Set Capillary        | 3700 V   | Set Dry Heater   | 180 °C    |
| Scan Begin  | 50 m/z     | Set End Plate Offset | -500 V   | Set Dry Gas      | 4.0 l/min |
| Scan End    | 600 m/z    | Set Charging Voltage | 2000 V   | Set Divert Valve | Source    |
|             |            | Set Corona           | 0 nA     | Set APCI Heater  | 0 °C      |

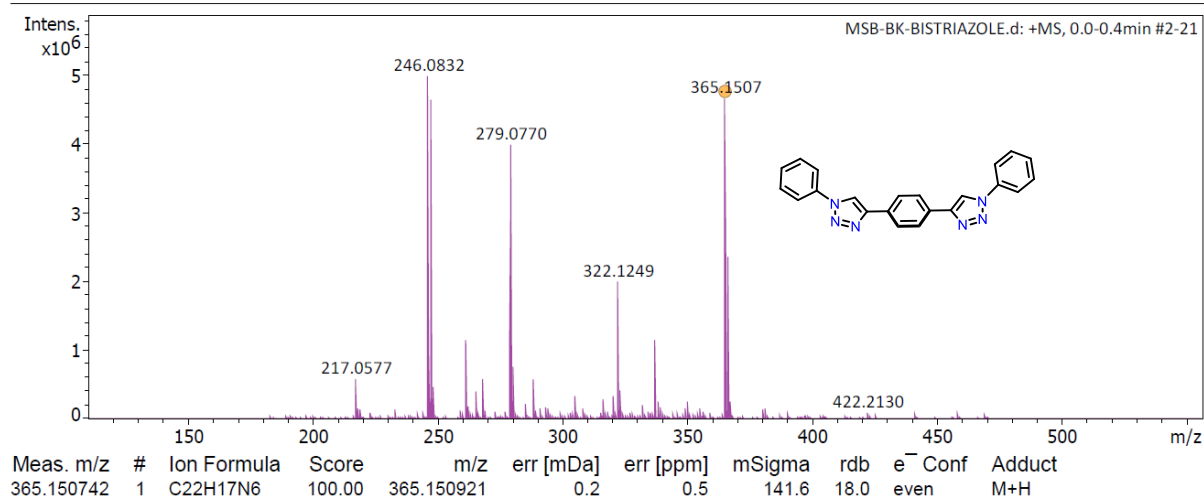

**Fig. S3** HRMS spectrum of **1a**.

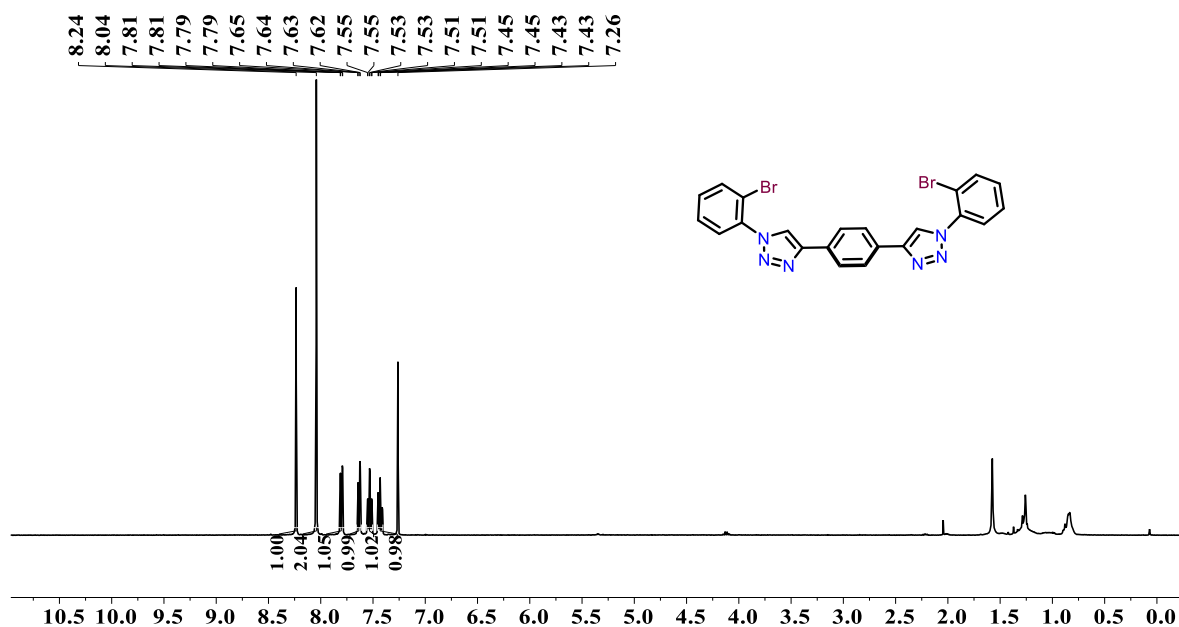

**Fig. S4** <sup>1</sup>H NMR spectrum of **1b** in CDCl<sub>3</sub> (400 MHz).

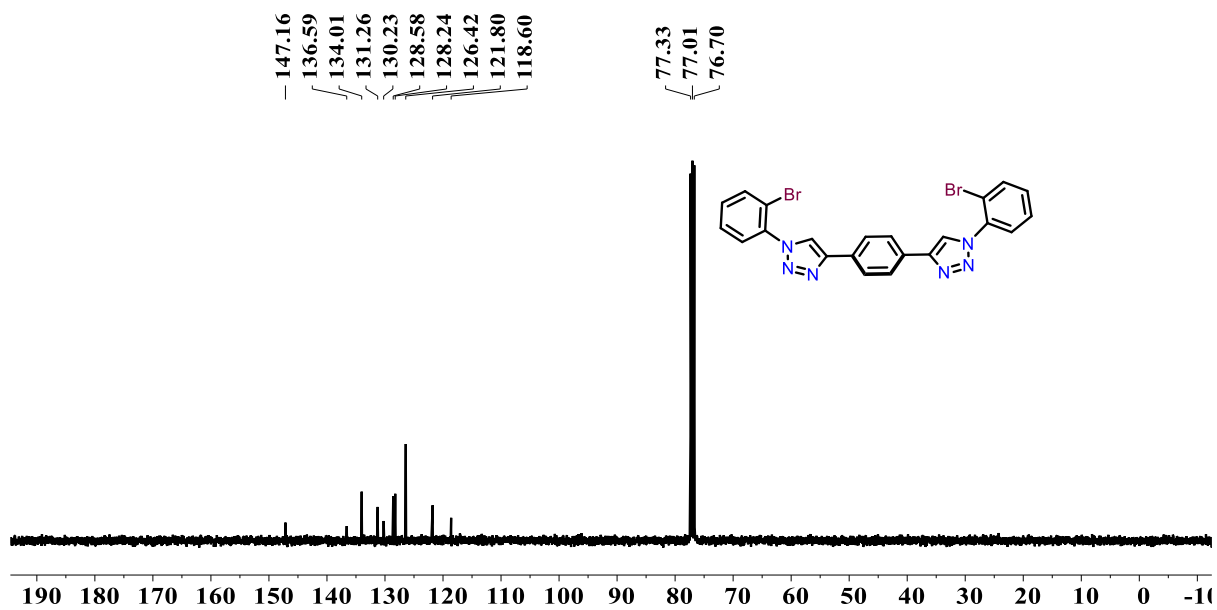

**Fig. S5**  $^{13}\text{C}\{^1\text{H}\}$  NMR spectrum of **1b** in  $\text{CDCl}_3$  (101 MHz).

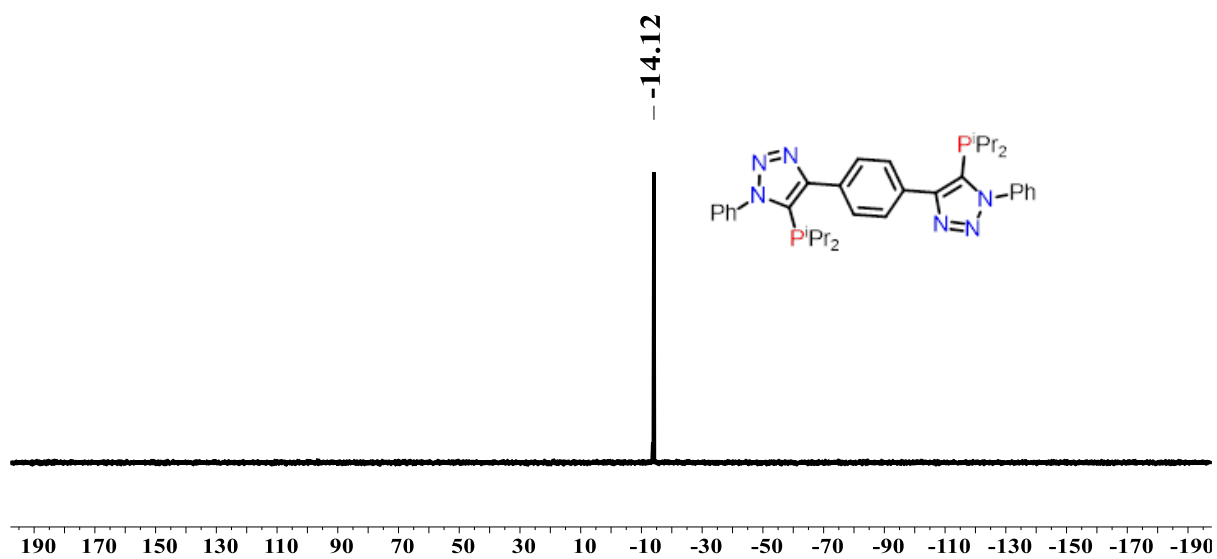

**Fig. S6**  $^{31}\text{P}\{^1\text{H}\}$  NMR spectrum of **2** in  $\text{CDCl}_3$  (162 MHz).

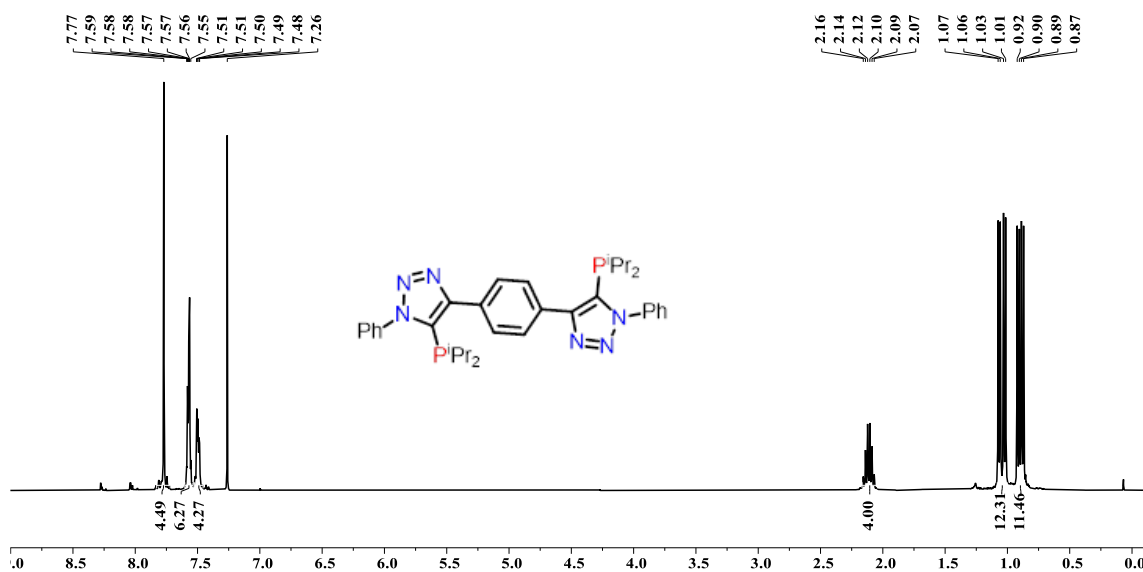

**Fig. S7**  $^1\text{H}$  NMR spectrum of **2** in  $\text{CDCl}_3$  (400 MHz).

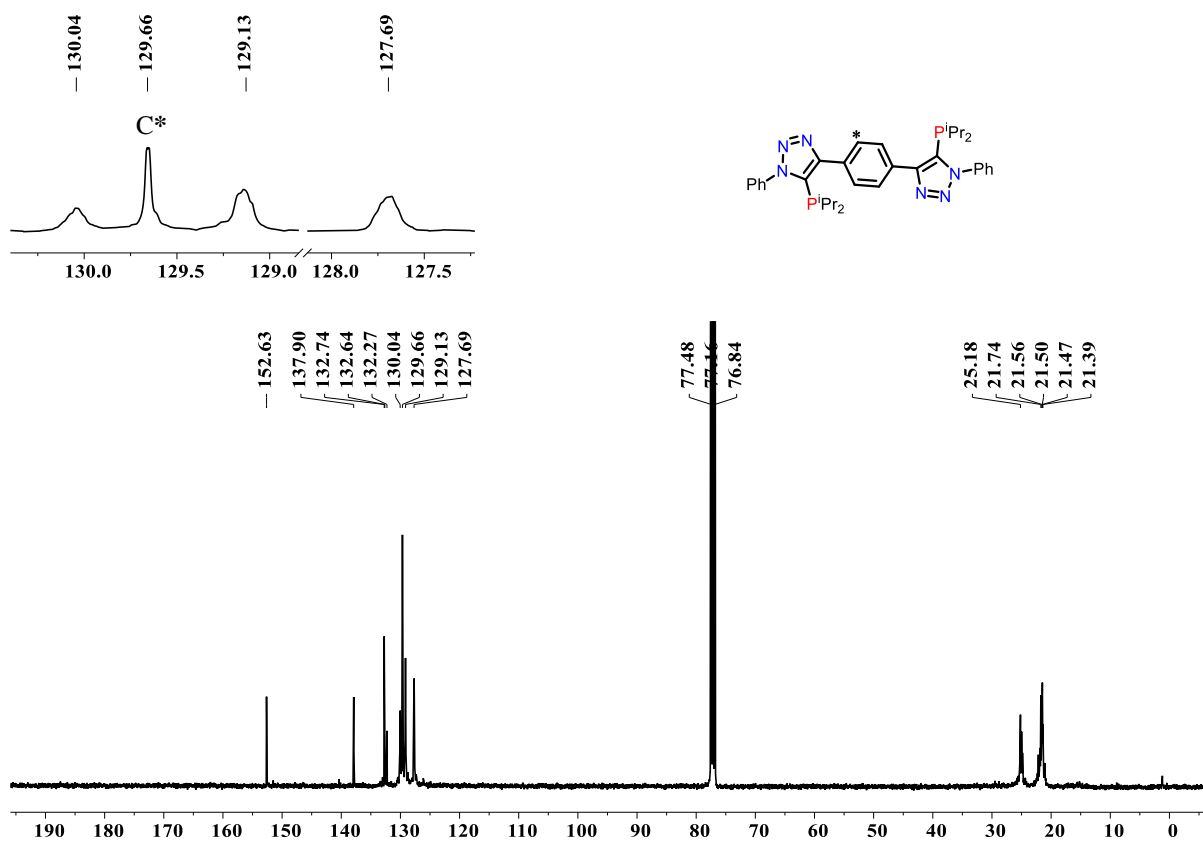

**Fig. S8**  $^{13}\text{C}\{^1\text{H}\}$  NMR spectrum of **2** in  $\text{CDCl}_3$  (101 MHz).

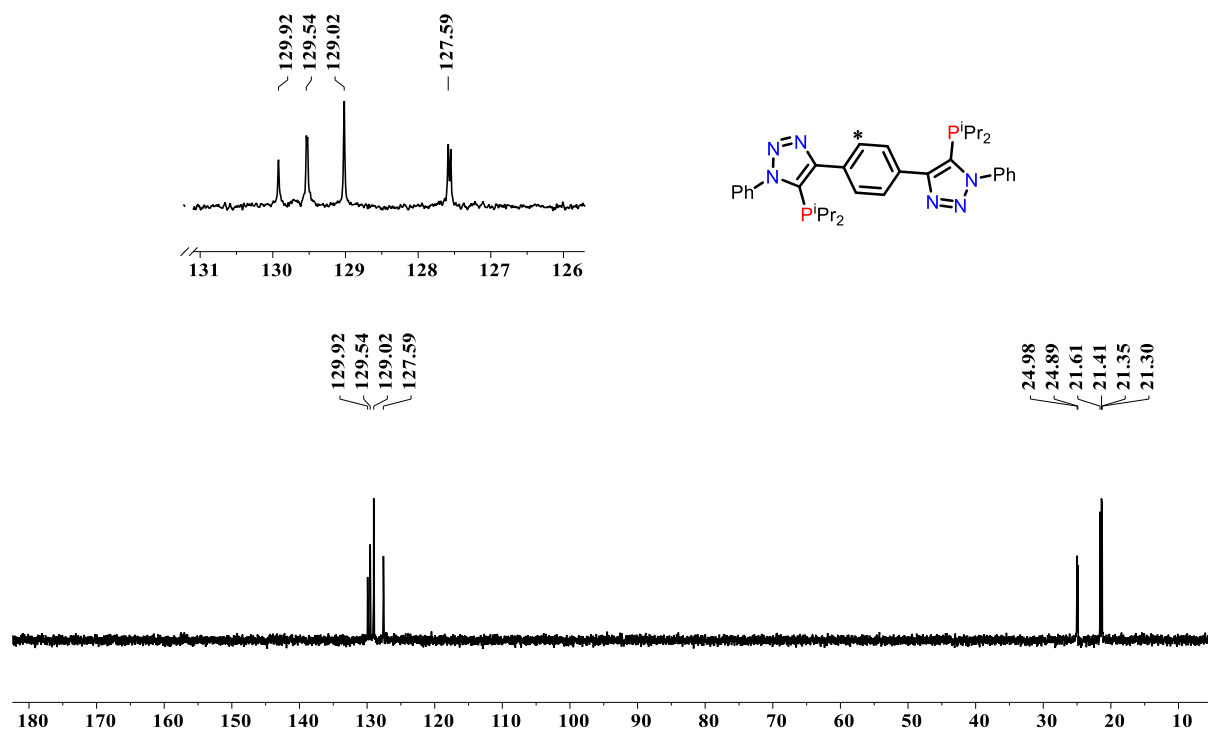

**Fig. S9**  $^{13}\text{C}\{^1\text{H}\}$  DEPT-135 spectrum of **2** in  $\text{CDCl}_3$  (101 MHz).

DEPARTMENT OF CHEMISTRY, I.I.T.(B)

Analysis Info

Analysis Name D:\Data\OCT-2018\MSB-BK-TRI-1.d  
 Method Tune\_pos\_NAF-1000.m  
 Sample Name MSB-BK-TRI-1  
 Comment C34H42N6P2

Acquisition Date 10/3/2018 8:37:18 PM

Operator MSB IN  
 Instrument maXis impact 282001.00081

Acquisition Parameter

|             |          |                       |            |                  |           |
|-------------|----------|-----------------------|------------|------------------|-----------|
| Source Type | ESI      | Ion Polarity          | Positive   | Set Nebulizer    | 0.5 Bar   |
| Focus       | Active   | Set Capillary         | 3700 V     | Set Dry Heater   | 180 °C    |
| Scan Begin  | 50 m/z   | Set End Plate Offset  | -500 V     | Set Dry Gas      | 4.0 l/min |
| Scan End    | 1000 m/z | Set Collision Cell RF | 1200.0 Vpp | Set Divert Valve | Source    |

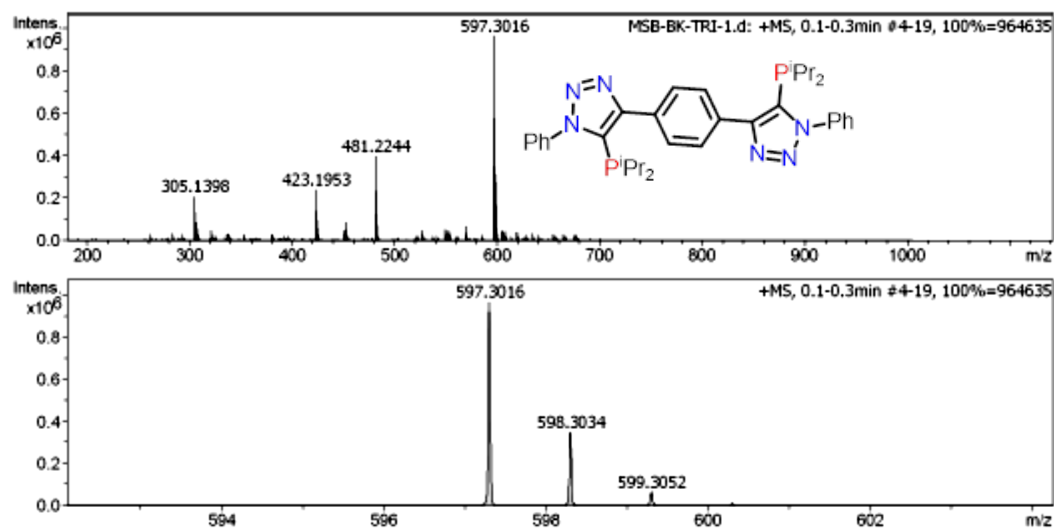

| Meas. m/z | # | Ion Formula | m/z      | err [ppm] | mSigma | # Sigma | Score  | rdB  | e <sup>-</sup> Conf | N-Rule |
|-----------|---|-------------|----------|-----------|--------|---------|--------|------|---------------------|--------|
| 597.3016  | 1 | C34H43N6P2  | 597.3019 | -0.4      | 19.3   | 1       | 100.00 | 17.5 | even                | ok     |

Fig. S10 HRMS spectrum of 2.

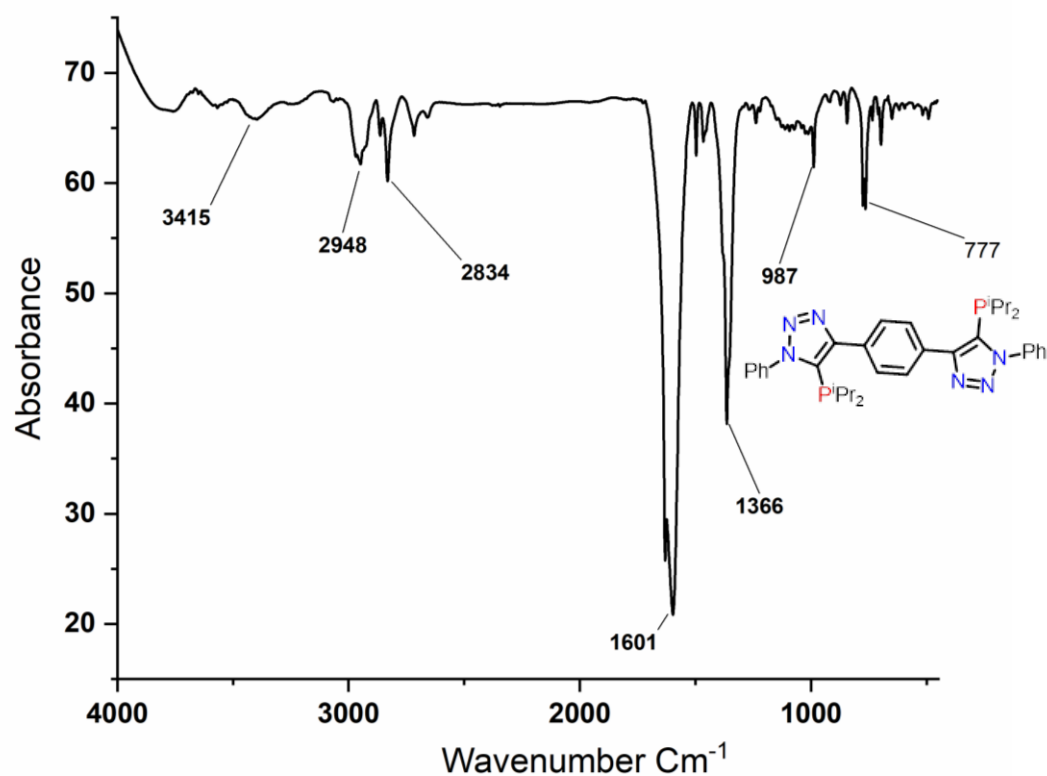

**Fig. S11** FT-IR spectrum of ligand **2**.

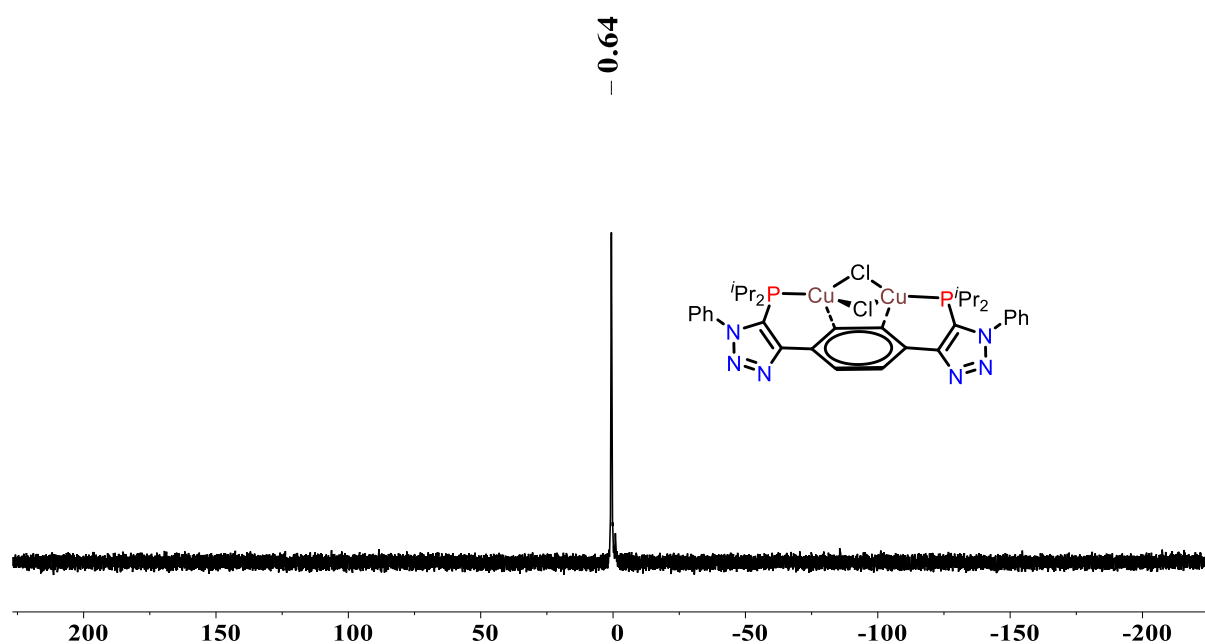

**Fig. S12**  $^{31}\text{P}\{^1\text{H}\}$  NMR spectrum of **3** in  $\text{CDCl}_3$  (162 MHz).

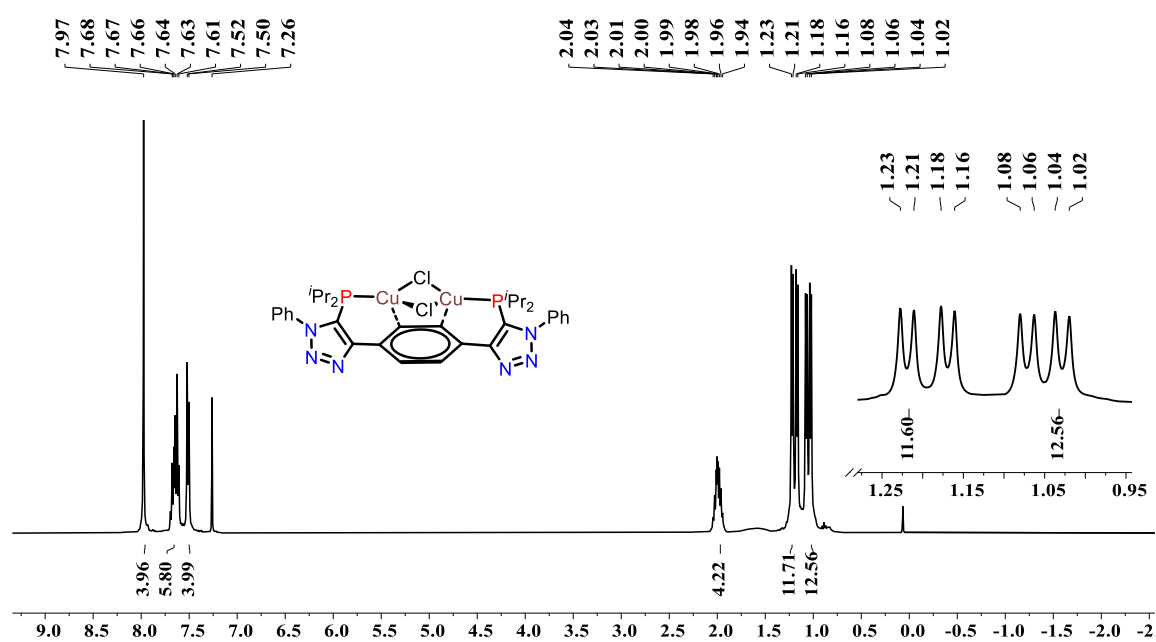

**Fig. S13**  $^1\text{H}$  NMR spectrum of **3** in  $\text{CDCl}_3$  (400 MHz).



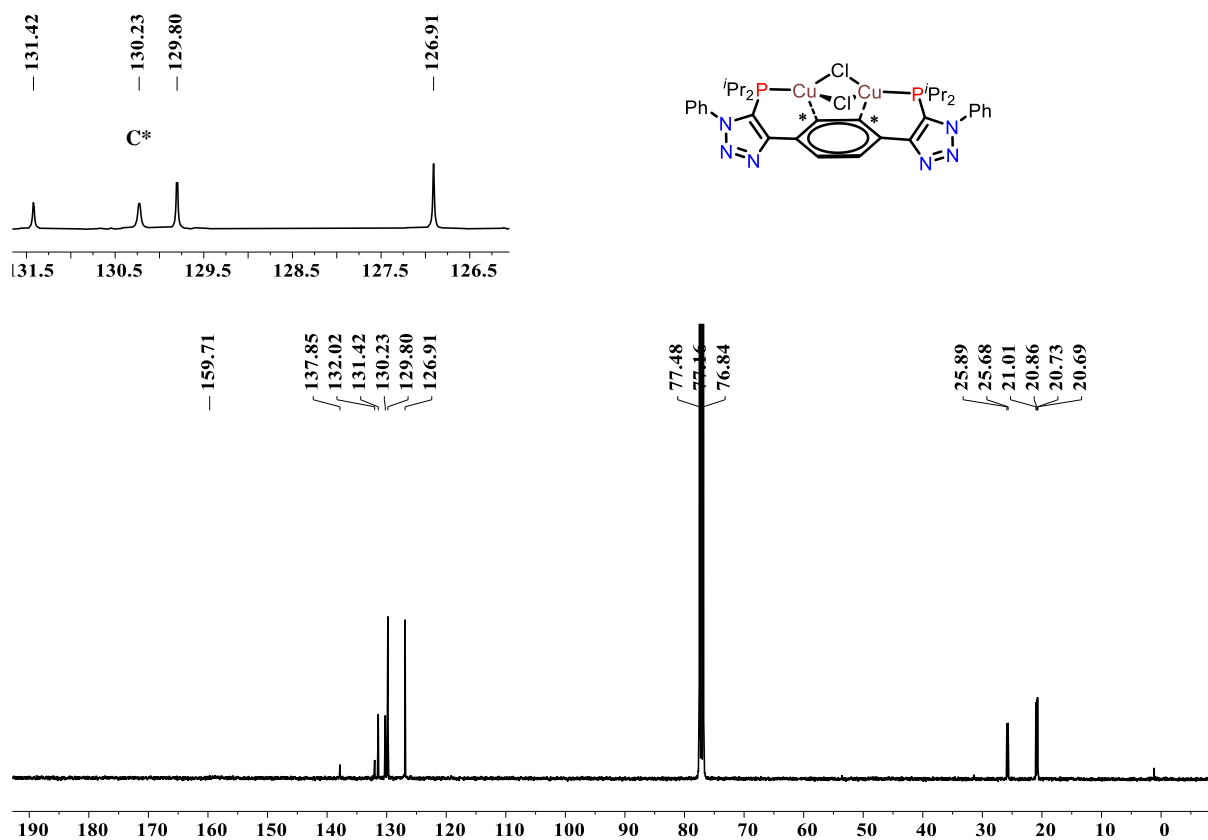

**Fig. S14**  $^{13}\text{C}\{^1\text{H}\}$  NMR spectrum of **3** in  $\text{CDCl}_3$  (101 MHz).

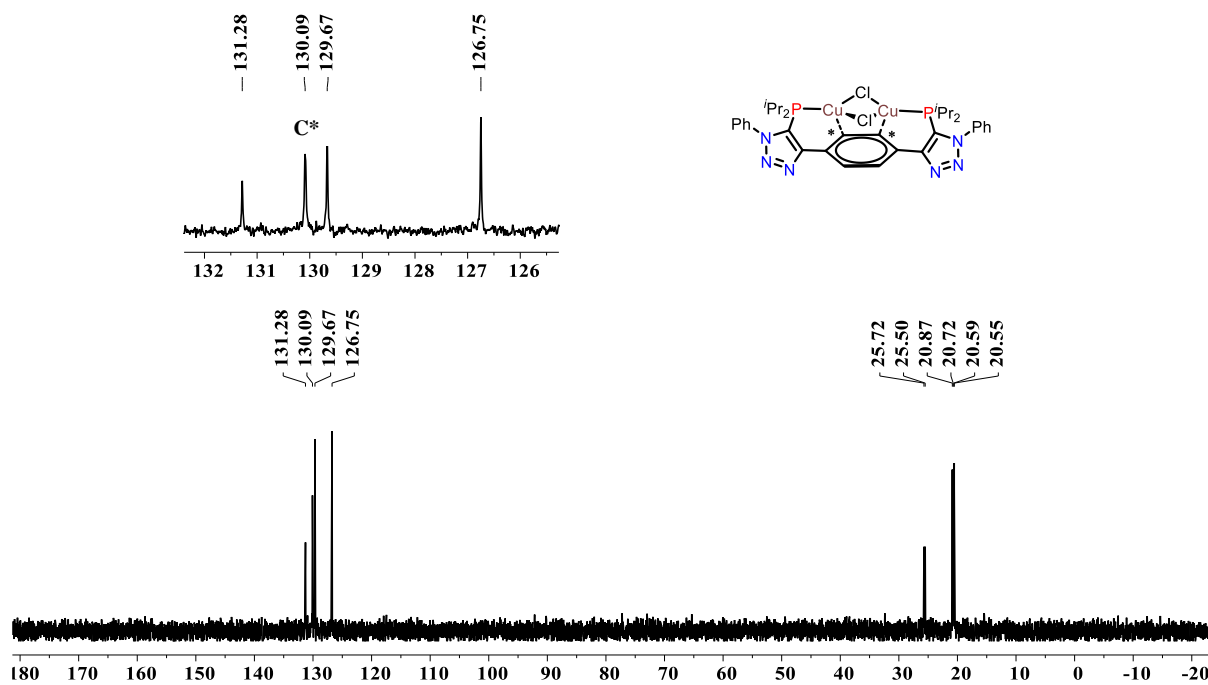

Fig. S15  $^{13}\text{C}\{^1\text{H}\}$  DEPT-135 spectrum of **3** in  $\text{CDCl}_3$  (101 MHz).

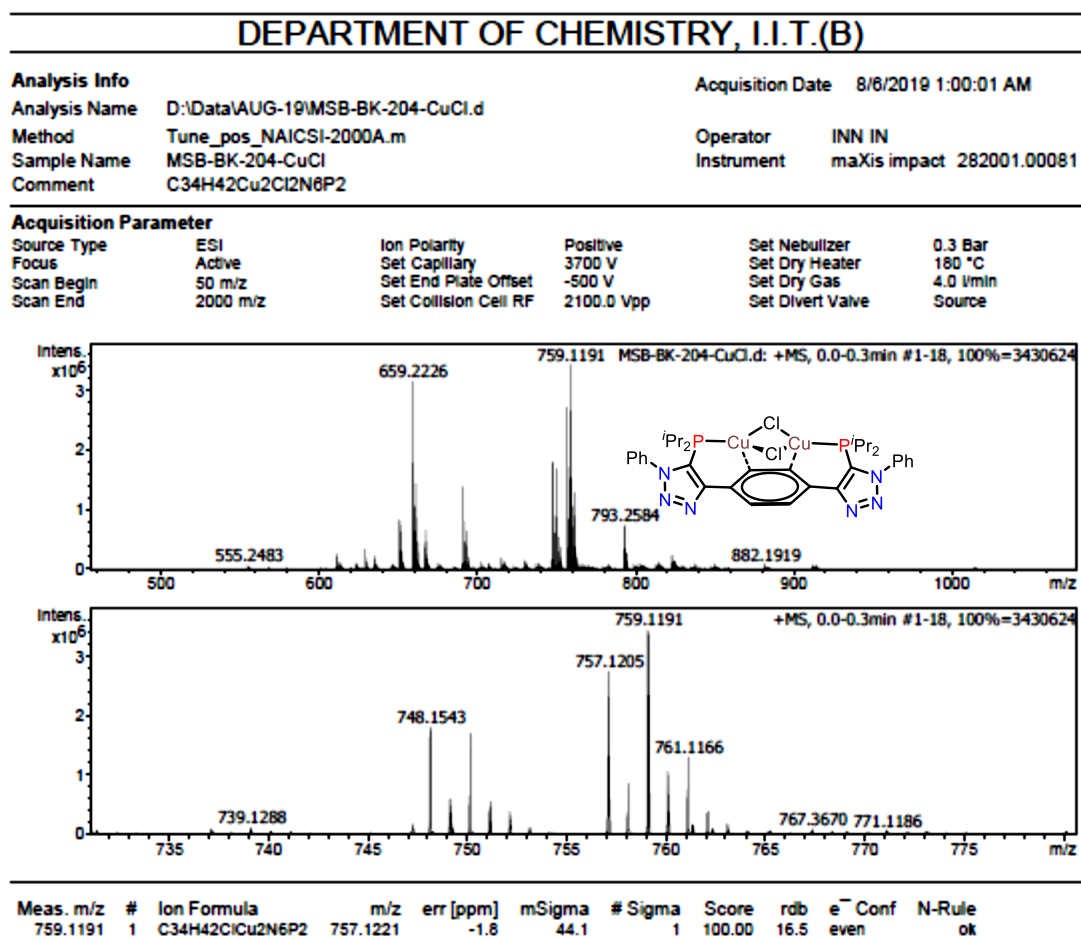

Fig. S16 HRMS spectrum of **3**.

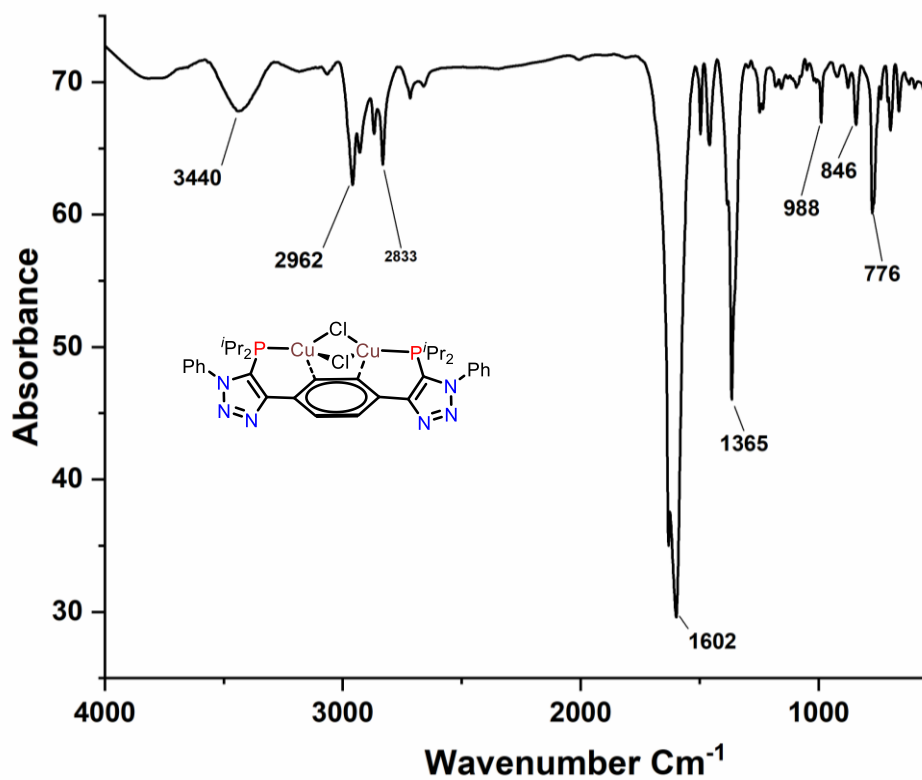

Fig. S17 FT-IR spectrum of **3**.

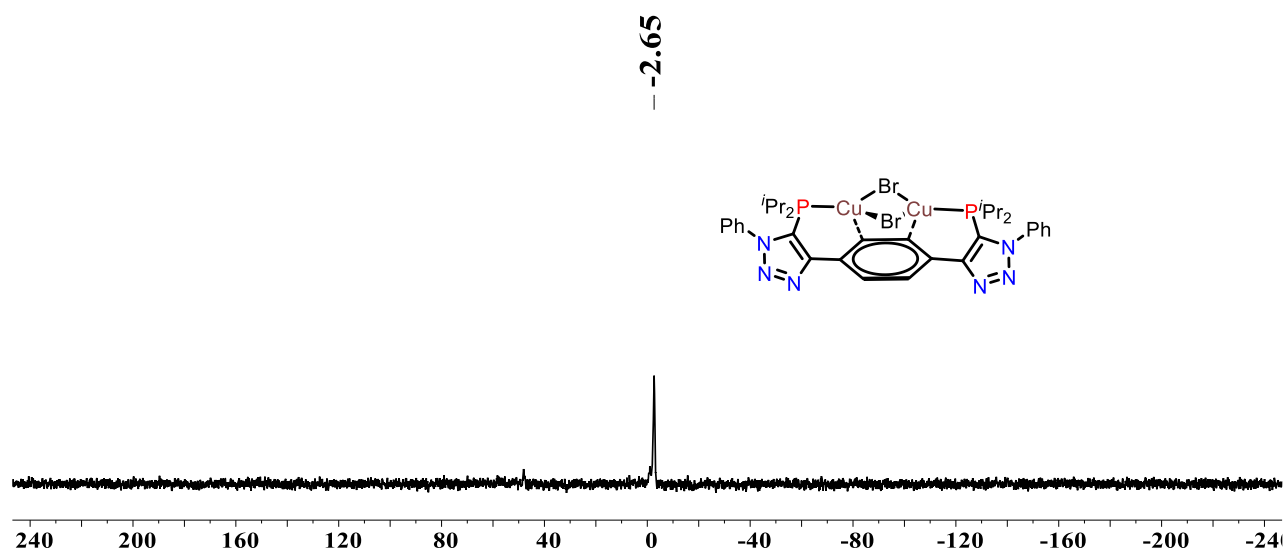

Fig. S18  $^{31}\text{P}\{^1\text{H}\}$  NMR spectrum of **4** in  $\text{CDCl}_3$  (162 MHz).

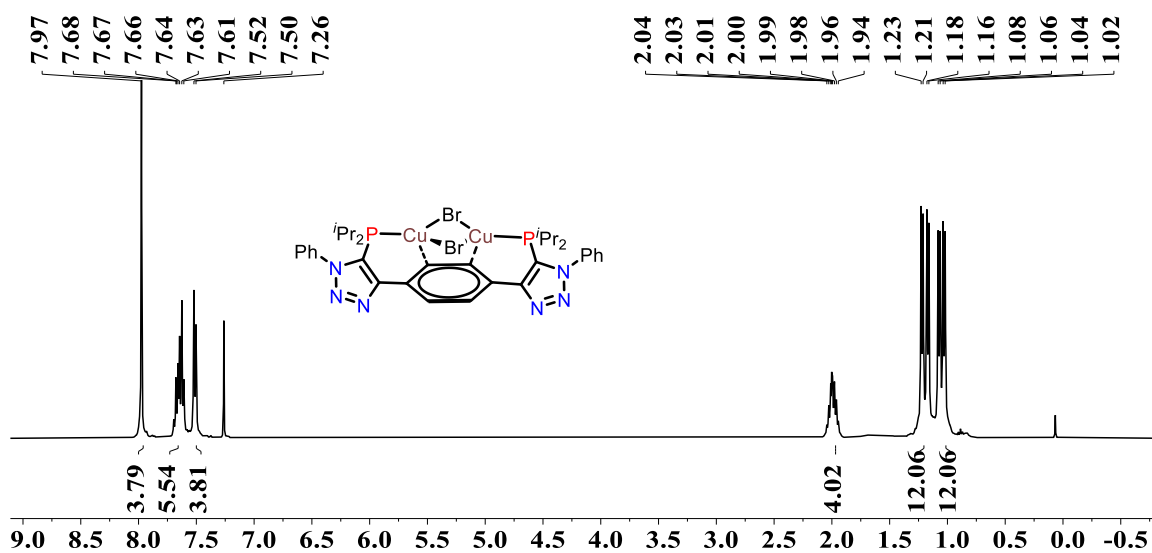

**Fig. S19**  $^1\text{H}$  NMR spectrum of **4** in  $\text{CDCl}_3$  (400 MHz).

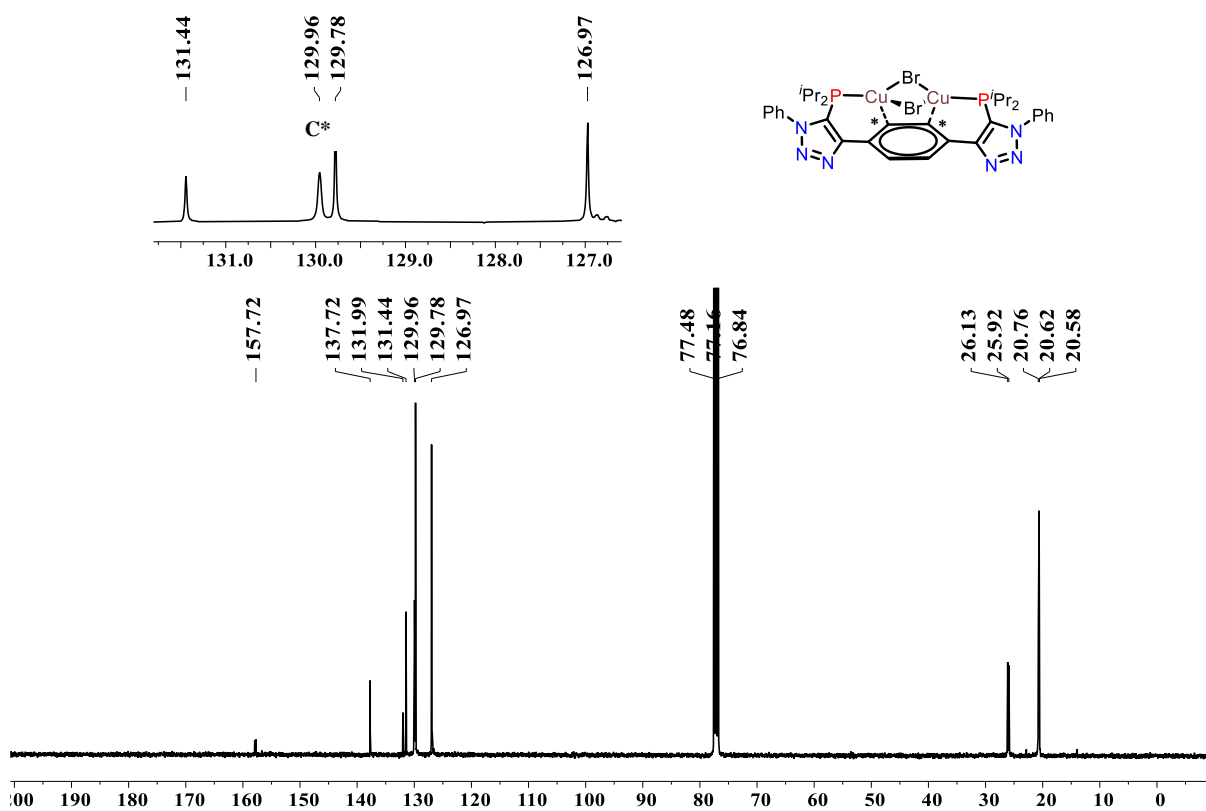

**Fig. S20**  $^{13}\text{C}\{^1\text{H}\}$  NMR spectrum of **4** in  $\text{CDCl}_3$  (101 MHz).

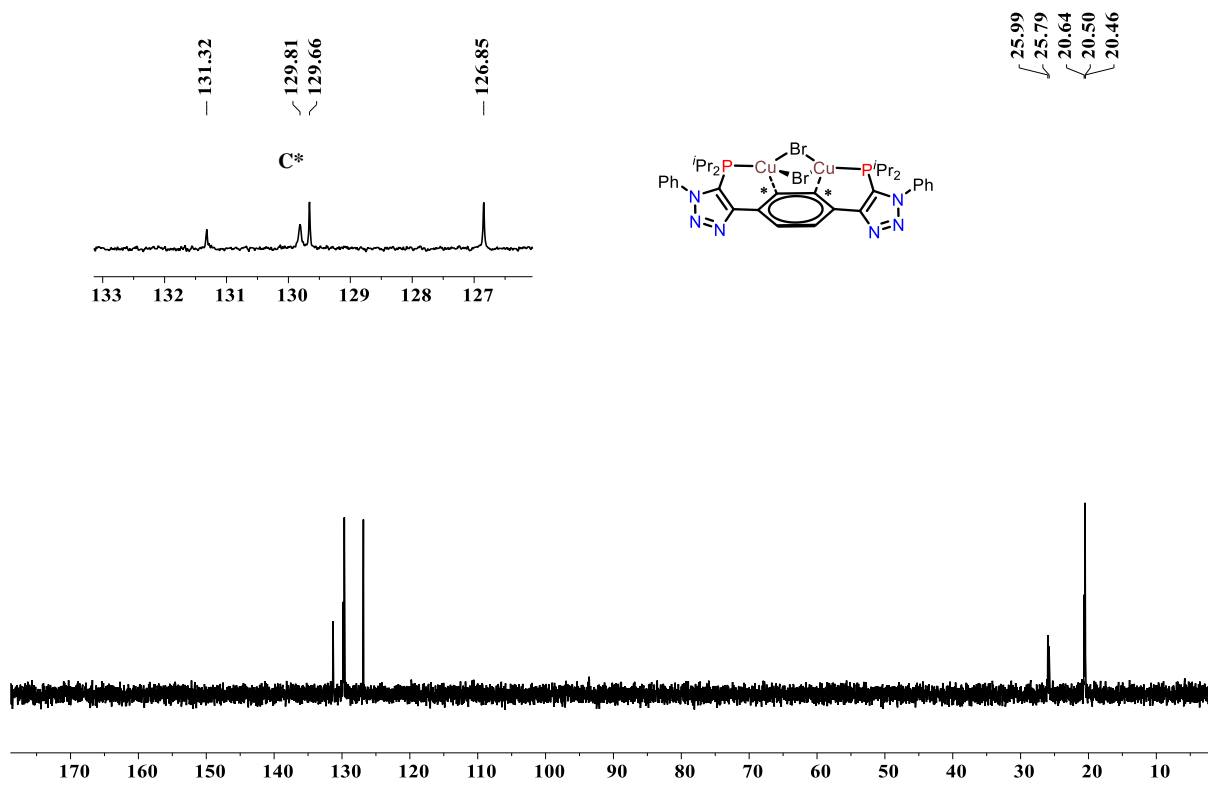

**Fig. S21**  $^{13}\text{C}\{^1\text{H}\}$  DEPT-135 spectrum of **5** in  $\text{CDCl}_3$  (101 MHz).

DEPARTMENT OF CHEMISTRY, I.I.T.(B)

**Analysis Info**

Analysis Name D:\Data\JULY-19\MSB-BK-204-CuBr.d  
 Method Tune\_pos\_NAICSI-3000a.m  
 Sample Name MSB-BK-204-CuBr  
 Comment C34H42Cu2Br2N6P2

Acquisition Date 7/18/2019 12:19:44 AM

Operator kpk  
 Instrument maXis impact 282001.00081

**Acquisition Parameter**

|             |          |                       |            |                  |           |
|-------------|----------|-----------------------|------------|------------------|-----------|
| Source Type | ESI      | Ion Polarity          | Positive   | Set Nebulizer    | 0.3 Bar   |
| Focus       | Active   | Set Capillary         | 3800 V     | Set Dry Heater   | 180 °C    |
| Scan Begin  | 50 m/z   | Set End Plate Offset  | -500 V     | Set Dry Gas      | 4.0 l/min |
| Scan End    | 3000 m/z | Set Collision Cell RF | 2100.0 Vpp | Set Divert Valve | Source    |

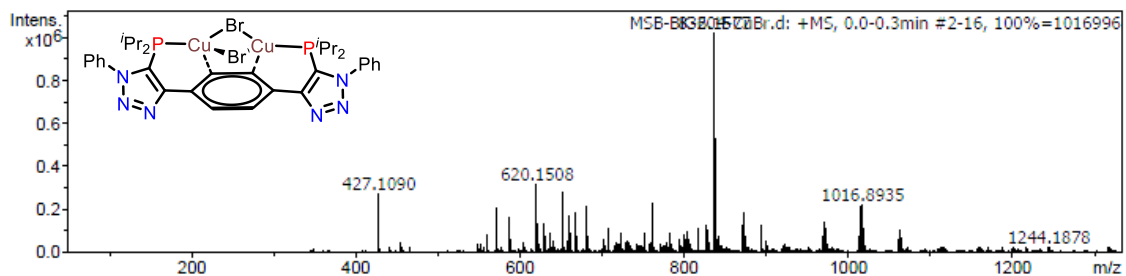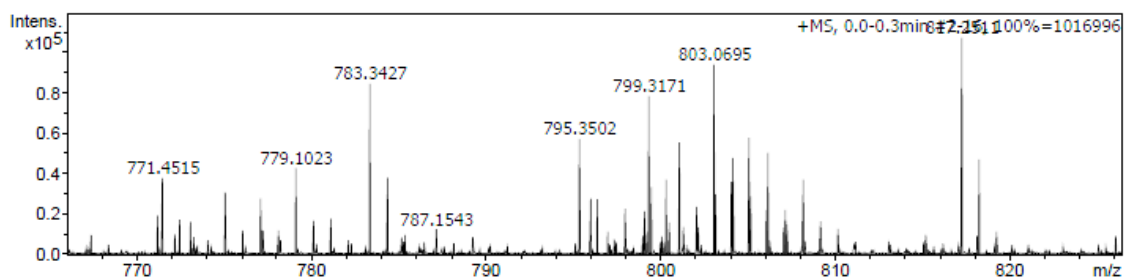

| Meas. m/z | # | Ion Formula     | m/z      | err [ppm] | mSigma | # Sigma | Score  | rdb  | e <sup>-</sup> Conf | N-Rule |
|-----------|---|-----------------|----------|-----------|--------|---------|--------|------|---------------------|--------|
| 803.0695  | 1 | C34H42BrCu2N6P2 | 801.0716 | -0.6      | 29.4   | 1       | 100.00 | 16.5 | even                | ok     |

**Fig. S22** HRMS spectrum of **4**.

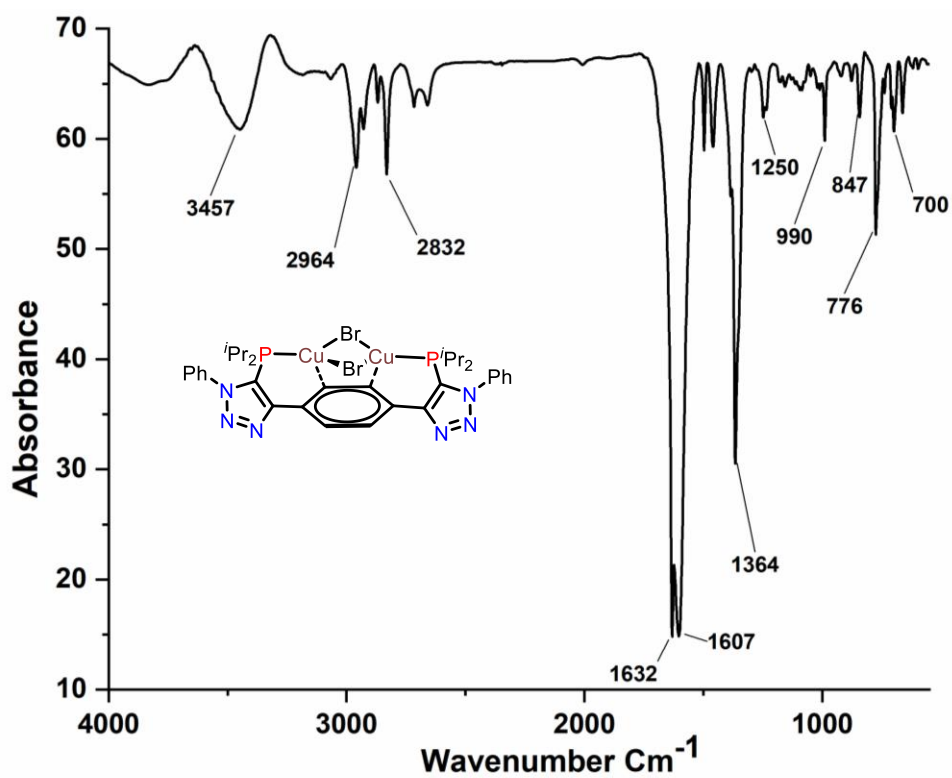

Fig. S23 FT-IR spectrum of **4**.

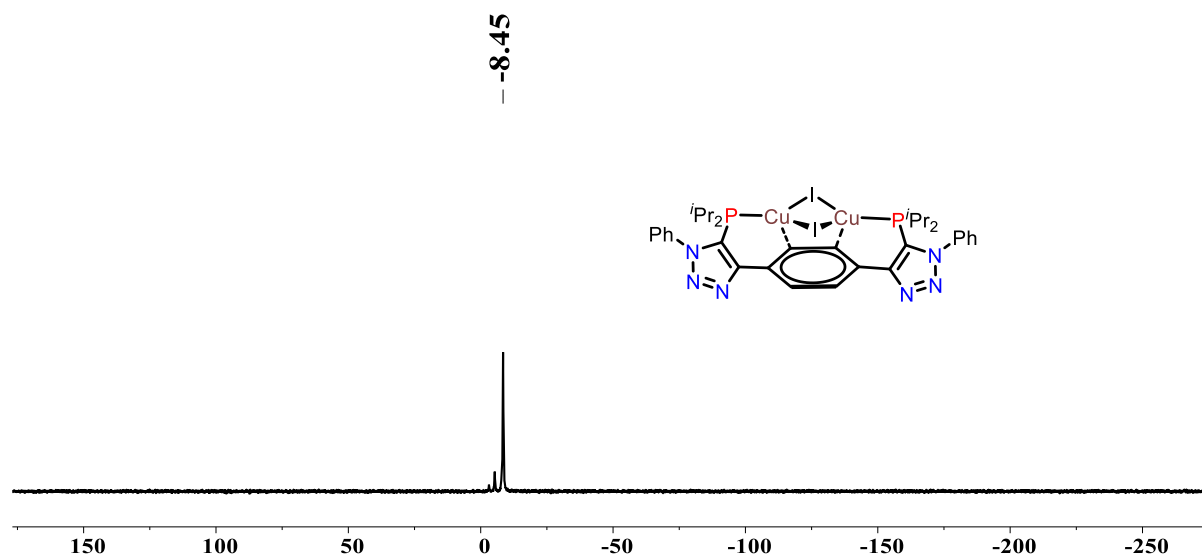

Fig. S24  $^{31}\text{P}\{^1\text{H}\}$  NMR spectrum of **5** in  $\text{CDCl}_3$  (162 MHz).

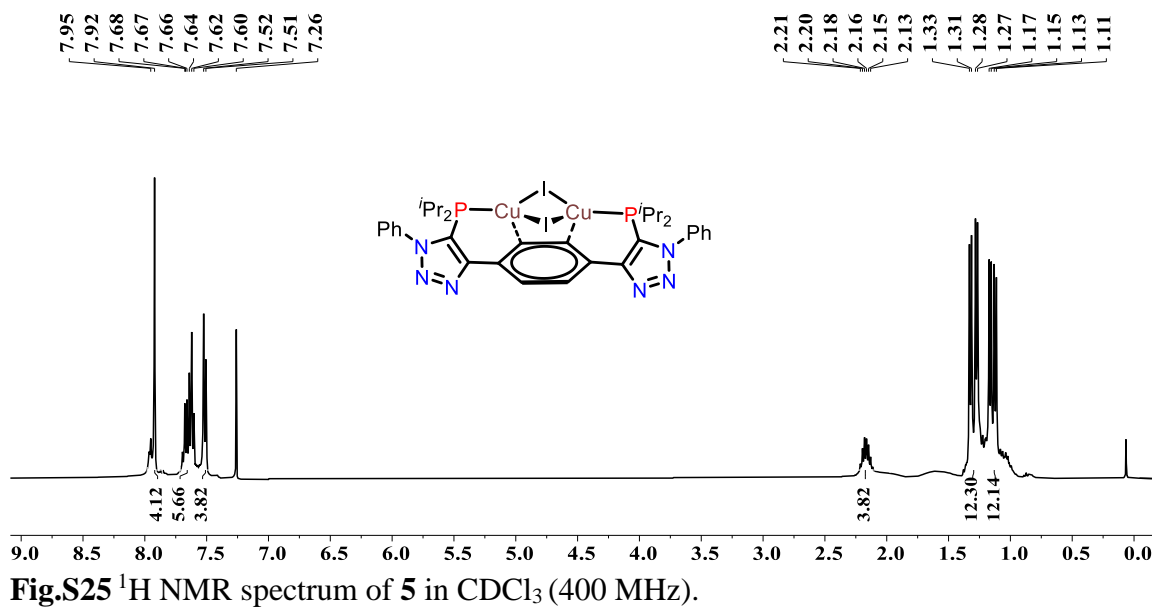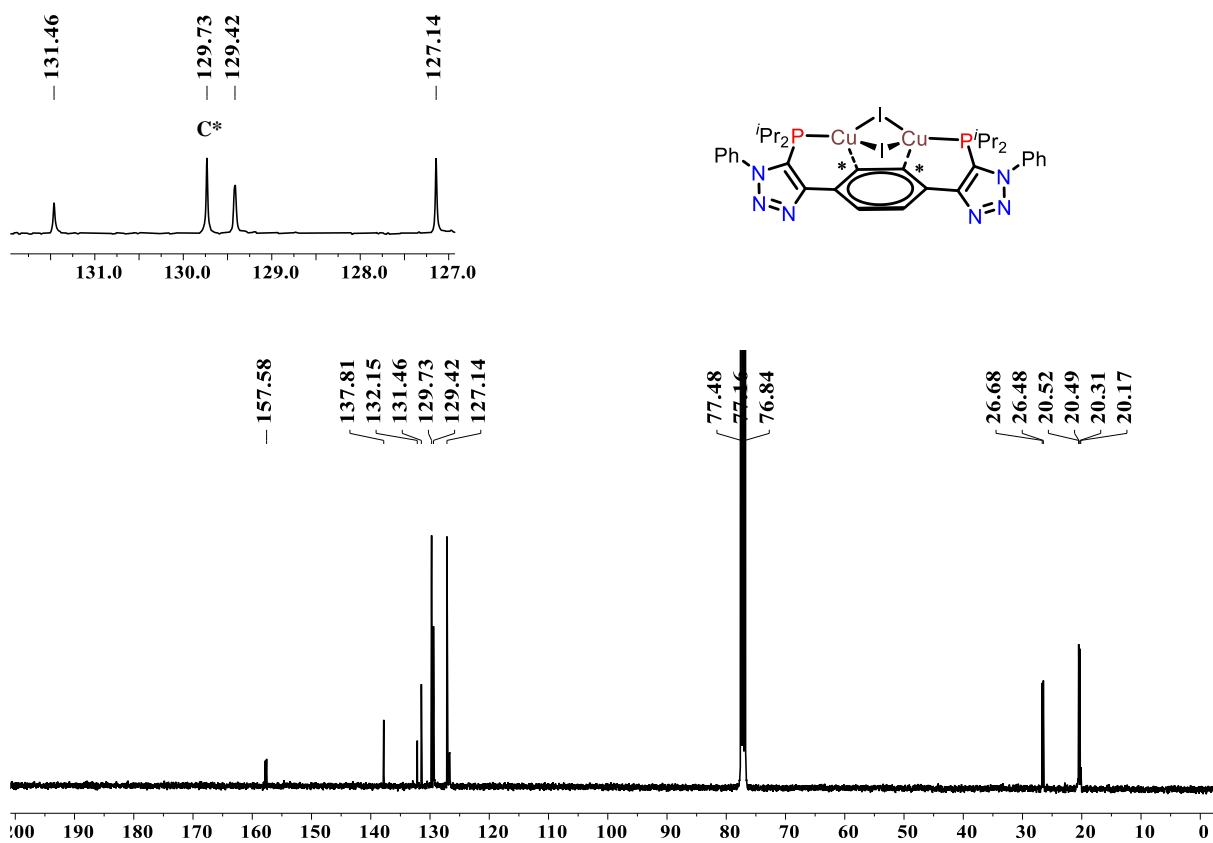



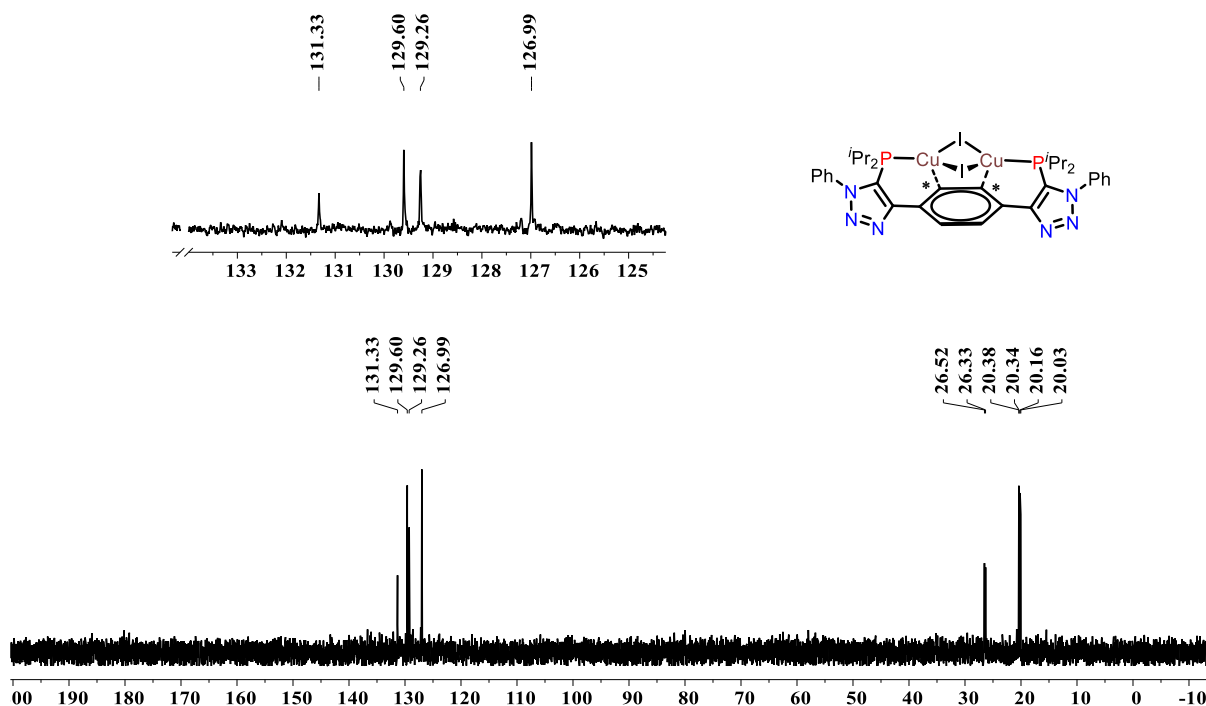

Fig. S27  $^{13}\text{C}\{^1\text{H}\}$  DEPT-135 spectrum of **5** in  $\text{CDCl}_3$  (101 MHz).

DEPARTMENT OF CHEMISTRY, I.I.T.(B)

Analysis Info

Analysis Name D:\Data\JUNE 2021\MSB-BK-Cul-dlmer-A.d  
 Method NaICsl\_pos\_1500.m  
 Sample Name MSB-BK-Cul-dlmer-A  
 Comment C34H42Cu2I2N6P2

Acquisition Date 6/29/2021 1:25:16 PM

Operator GKL-IN  
 Instrument maXis impact 282001.00081

Acquisition Parameter

|             |            |                      |          |                  |           |
|-------------|------------|----------------------|----------|------------------|-----------|
| Source Type | ESI        | Ion Polarity         | Positive | Set Nebulizer    | 0.3 Bar   |
| Focus       | Not active | Set Capillary        | 3700 V   | Set Dry Heater   | 180 °C    |
| Scan Begin  | 50 m/z     | Set End Plate Offset | -500 V   | Set Dry Gas      | 4.0 l/min |
| Scan End    | 1500 m/z   | Set Charging Voltage | 2000 V   | Set Divert Valve | Source    |
|             |            | Set Corona           | 0 nA     | Set APCI Heater  | 0 °C      |

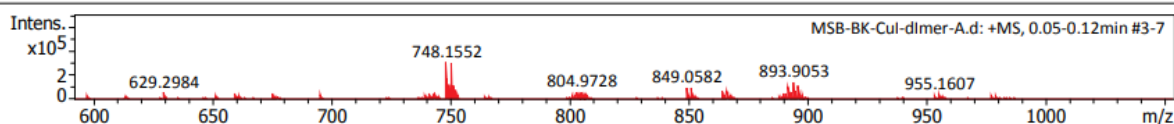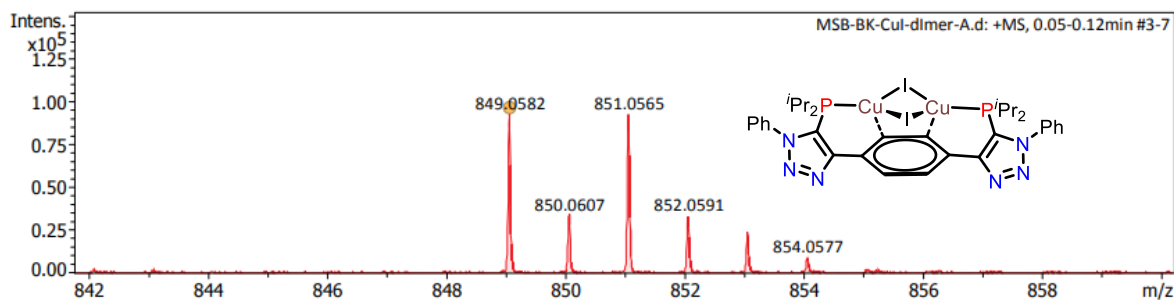

| Meas. m/z | # | Ion Formula     | m/z      | err [ppm] | mSigma | # mSigma | Score  | rdb  | e <sup>-</sup> Conf | N-Rule |
|-----------|---|-----------------|----------|-----------|--------|----------|--------|------|---------------------|--------|
| 849.0582  | 1 | C34H42Cu2I2N6P2 | 849.0577 | -0.6      | 17.6   | 1        | 100.00 | 23.0 | even                | ok     |

Fig. S28 HRMS spectrum of **5**.

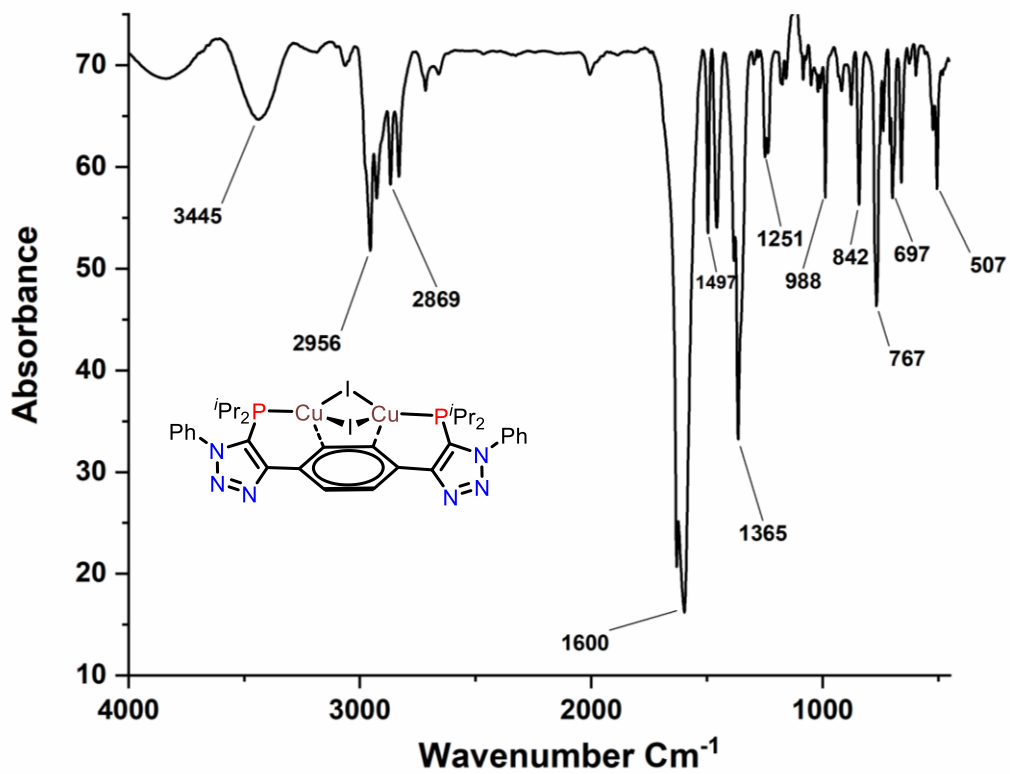

Fig. S29 FT-IR spectrum of **5**.

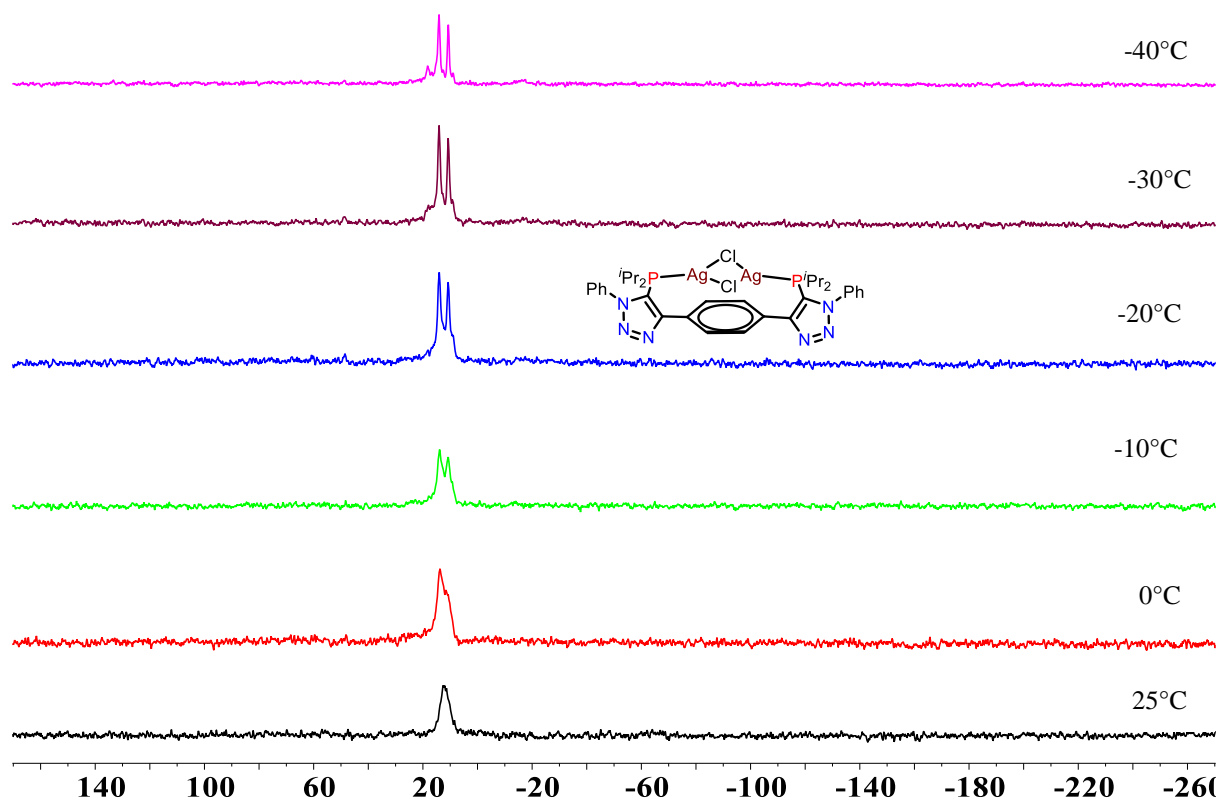

Fig. S30  $^{31}\text{P}\{^1\text{H}\}$  VT NMR data for **6**.

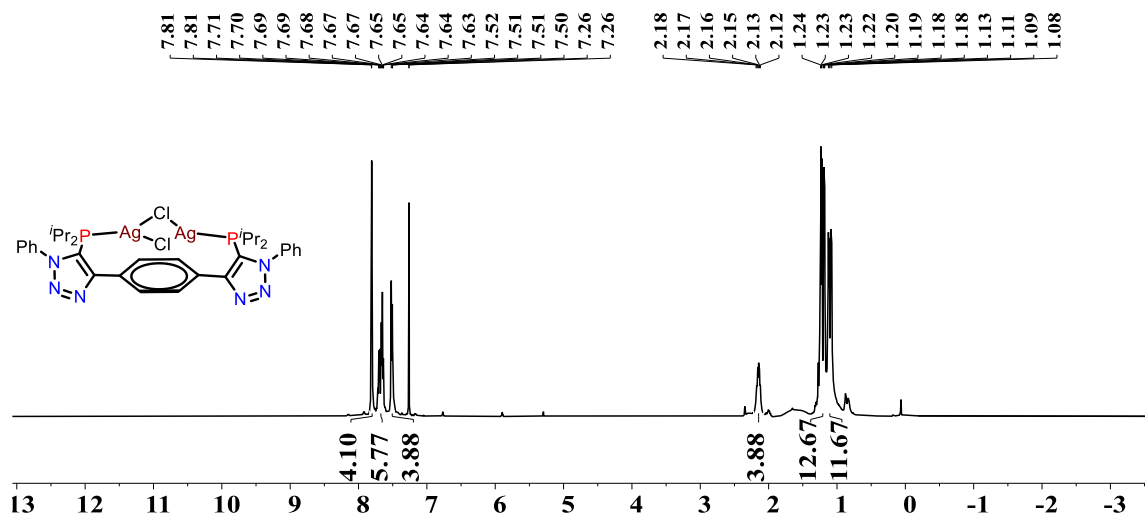

**Fig. S31**  $^1\text{H}$  NMR spectrum of **6** in  $\text{CDCl}_3$  (400 MHz).

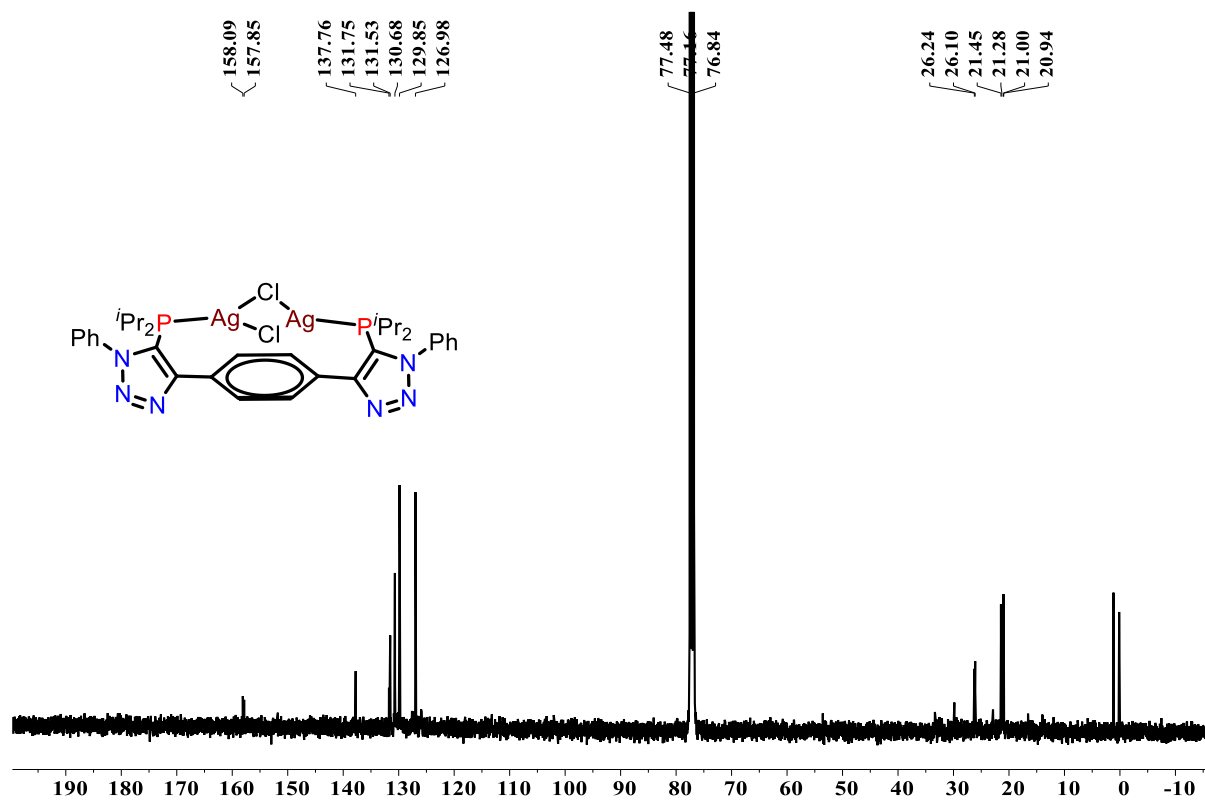

**Fig. S32**  $^{13}\text{C}\{^1\text{H}\}$  NMR spectrum of **6** in  $\text{CDCl}_3$  (101 MHz).

DEPARTMENT OF CHEMISTRY, I.I.T.(B)

**Analysis Info**  
 Analysis Name D:\Data\MAY 2021\MSB-BK-BISPHOS-AgCl-CUBANE-B.d  
 Method NaICsl\_pos\_1500hplc.m  
 Sample Name MSB-BK-BISPHOS-AgCl-CUBANE-B  
 Comment C34H42Ag2Cl2N6P2  
 Acquisition Date 5/6/2021 5:50:58 PM  
 Operator SJG-IN  
 Instrument maXis impact 282001.00081

**Acquisition Parameter**

|             |            |                      |          |                  |           |
|-------------|------------|----------------------|----------|------------------|-----------|
| Source Type | ESI        | Ion Polarity         | Positive | Set Nebulizer    | 0.4 Bar   |
| Focus       | Not active | Set Capillary        | 3700 V   | Set Dry Heater   | 200 °C    |
| Scan Begin  | 50 m/z     | Set End Plate Offset | -500 V   | Set Dry Gas      | 6.0 l/min |
| Scan End    | 1500 m/z   | Set Charging Voltage | 2000 V   | Set Divert Valve | Source    |
|             |            | Set Corona           | 0 nA     | Set APCI Heater  | 0 °C      |

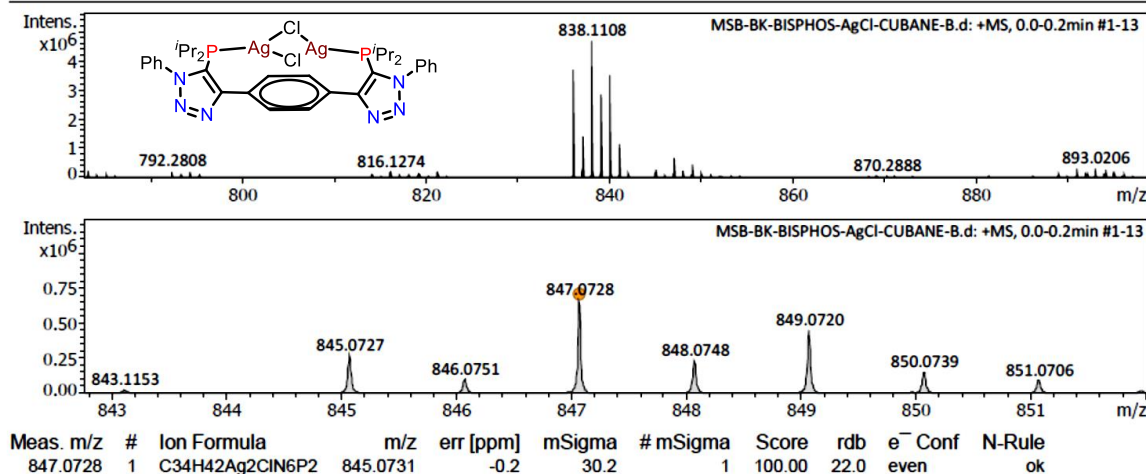

Fig. S33 HRMS spectrum of 6.

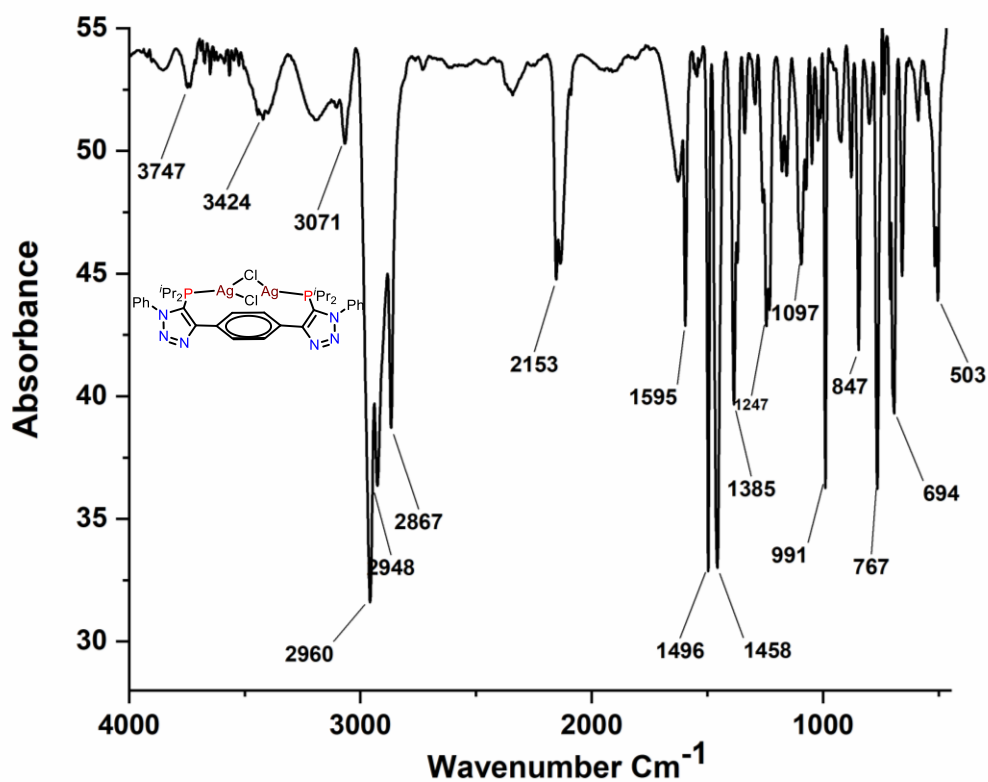

Fig. S34 FT-IR spectrum 6.

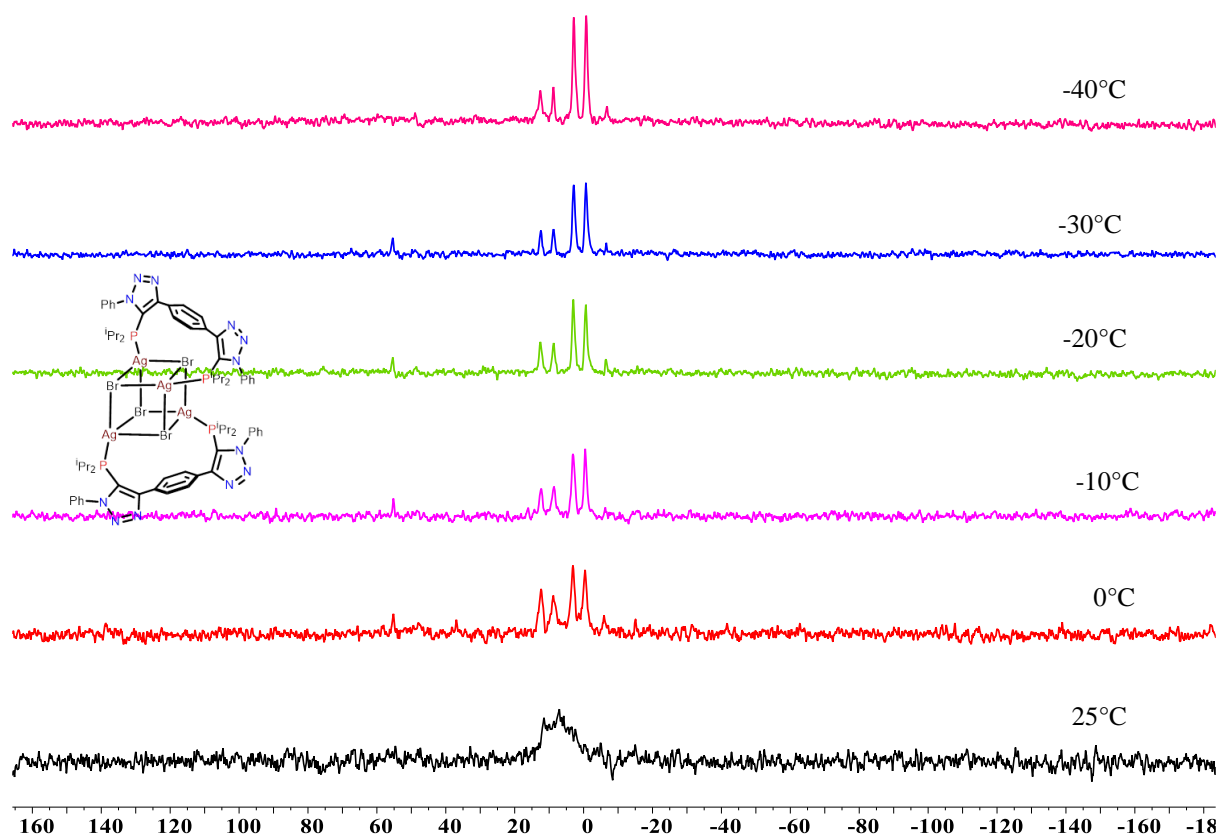

Fig. S35  $^{31}\text{P}\{^1\text{H}\}$  VT NMR data for 7.

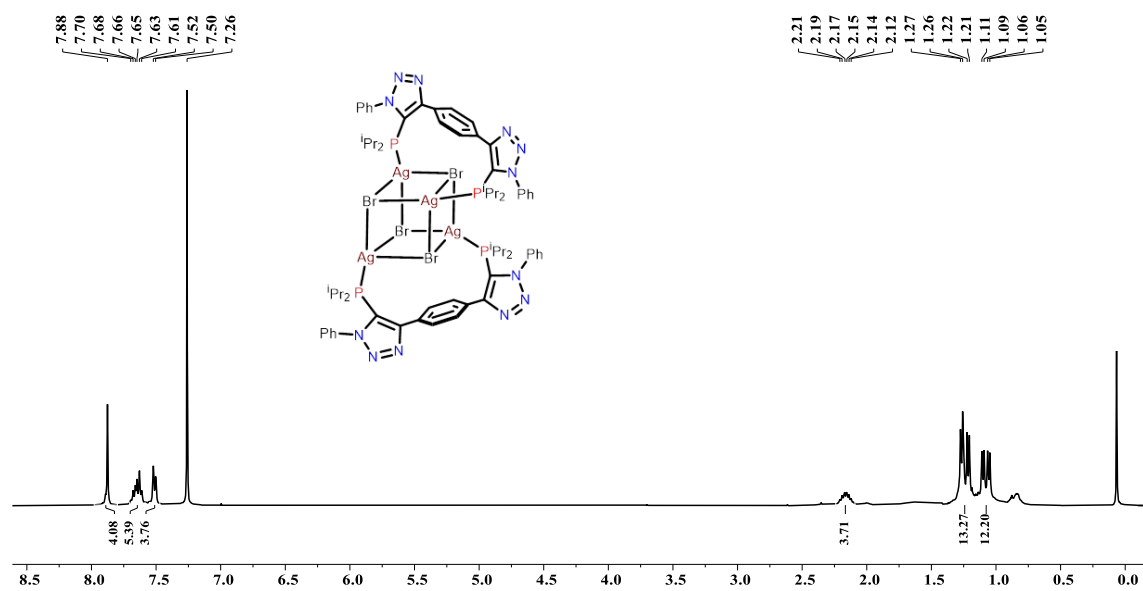

Fig. S36  $^1\text{H}$  NMR spectrum of 7 in  $\text{CDCl}_3$  (400 MHz).

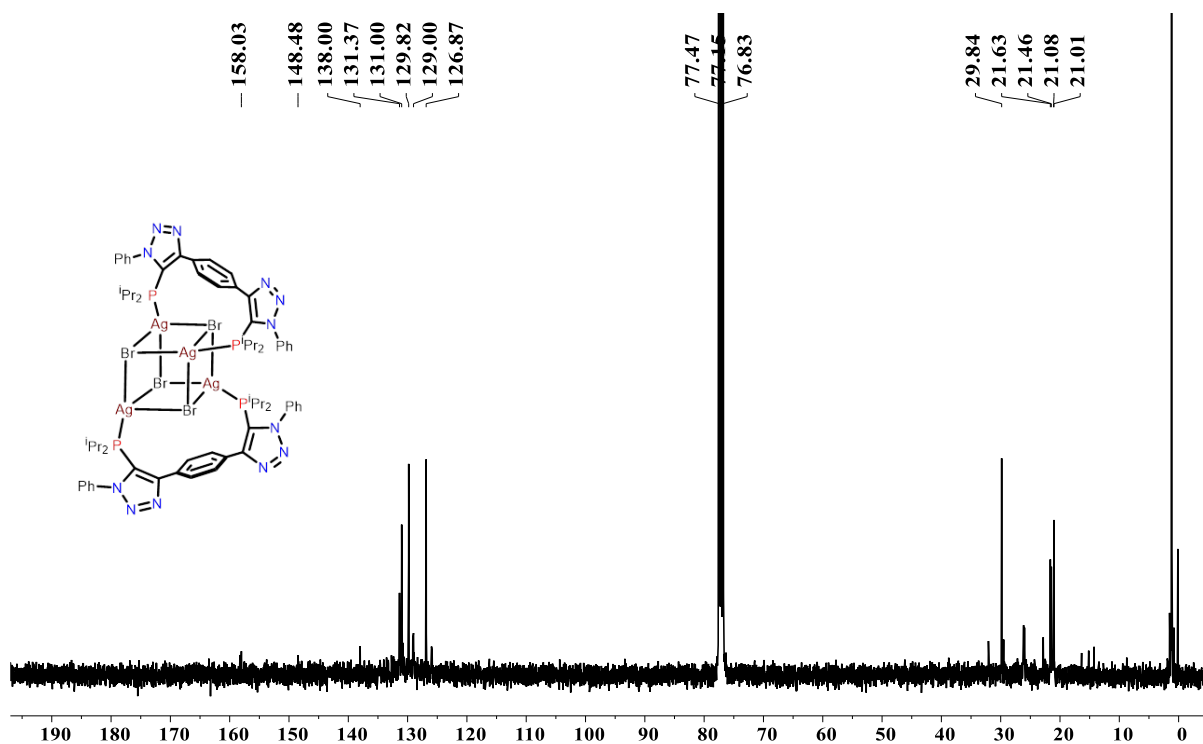

Fig. S37  $^{13}\text{C}\{^1\text{H}\}$  NMR spectrum of **7** in  $\text{CDCl}_3$  (101 MHz).

DEPARTMENT OF CHEMISTRY, I.I.T.(B)

Analysis Info

Analysis Name D:\Data\MAR-21\MSB-BK-AgBr-Cubane-C.d  
 Method NaICsI\_pos\_1500hplc.m  
 Sample Name MSB-BK-AgBr-Cubane-C  
 Comment C34H42Ag2Br2P2N6

Acquisition Date 3/16/2021 9:19:18 AM

Operator AK IN  
 Instrument maXis impact 282001.00081

Acquisition Parameter

|             |            |                      |          |                  |           |
|-------------|------------|----------------------|----------|------------------|-----------|
| Source Type | ESI        | Ion Polarity         | Positive | Set Nebulizer    | 0.4 Bar   |
| Focus       | Not active | Set Capillary        | 3700 V   | Set Dry Heater   | 200 °C    |
| Scan Begin  | 50 m/z     | Set End Plate Offset | -500 V   | Set Dry Gas      | 6.0 l/min |
| Scan End    | 1500 m/z   | Set Charging Voltage | 2000 V   | Set Divert Valve | Source    |
|             |            | Set Corona           | 0 nA     | Set APCI Heater  | 0 °C      |

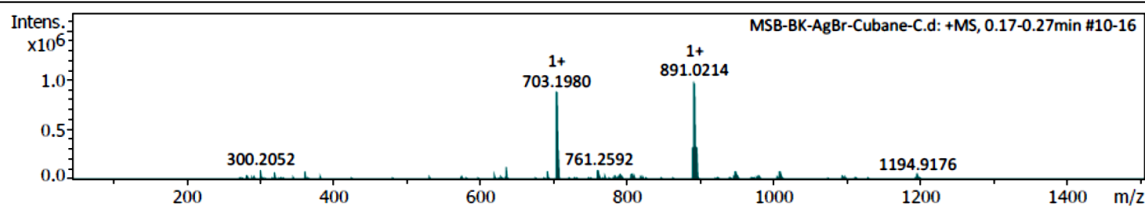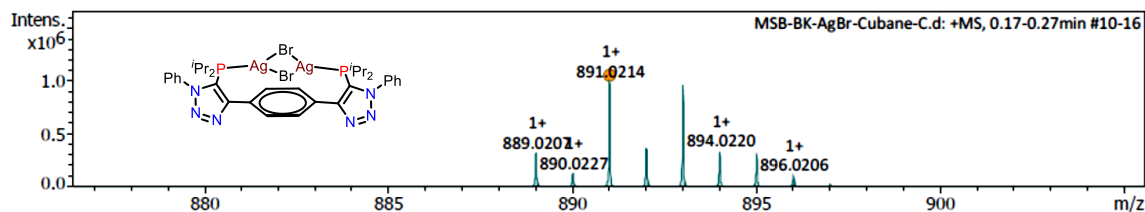

| Meas. m/z  | # | Ion Formula     | Score  | m/z        | err [mDa] | err [ppm] | mSigma | rdb  | e <sup>-</sup> Conf | Adduct |
|------------|---|-----------------|--------|------------|-----------|-----------|--------|------|---------------------|--------|
| 891.021419 | 1 | C34H42Ag2BrN6P2 | 100.00 | 889.022592 | 0.4       | 0.5       | 23.2   | 21.0 | even                | M      |

Fig. S38 HRMS spectrum of **7**.

DEPARTMENT OF CHEMISTRY, I.I.T.(B)

**Analysis Info**  
 Analysis Name D:\Data\JULY 2021\MSB-BK=-Ag-TETRAMER-1.d  
 Method NaICsl\_pos\_3000.m  
 Sample Name MSB-BK=-Ag-TETRAMER-1  
 Comment C68H84N16P4Ag4Br4  
 Acquisition Date 7/19/2021 7:41:19 PM  
 Operator SJG-IN  
 Instrument maXis impact 282001.00081

**Acquisition Parameter**

|             |            |                      |          |                  |           |
|-------------|------------|----------------------|----------|------------------|-----------|
| Source Type | ESI        | Ion Polarity         | Positive | Set Nebulizer    | 0.3 Bar   |
| Focus       | Not active | Set Capillary        | 3700 V   | Set Dry Heater   | 180 °C    |
| Scan Begin  | 50 m/z     | Set End Plate Offset | -500 V   | Set Dry Gas      | 4.0 l/min |
| Scan End    | 3000 m/z   | Set Charging Voltage | 2000 V   | Set Divert Valve | Source    |
|             |            | Set Corona           | 0 nA     | Set APCI Heater  | 0 °C      |

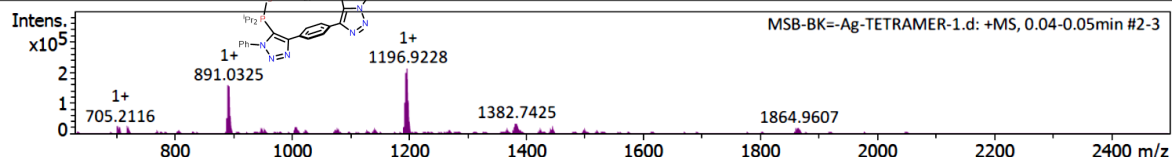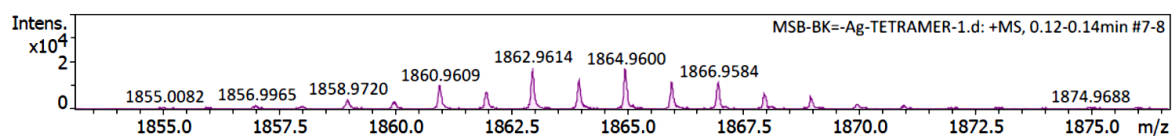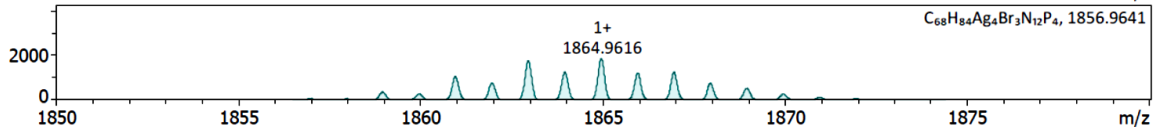

| Meas. m/z   | # | Ion Formula       | Score  | m/z         | err [mDa] | err [ppm] | mSigma | rdb  | e <sup>-</sup> Conf | Adduct |
|-------------|---|-------------------|--------|-------------|-----------|-----------|--------|------|---------------------|--------|
| 1862.961363 | 1 | C68H84Ag4Br3N12P4 | 100.00 | 1856.964069 | 0.7       | 0.4       | 46.4   | 42.0 | even                | M      |

Fig. S39 HRMS spectrum of 7.

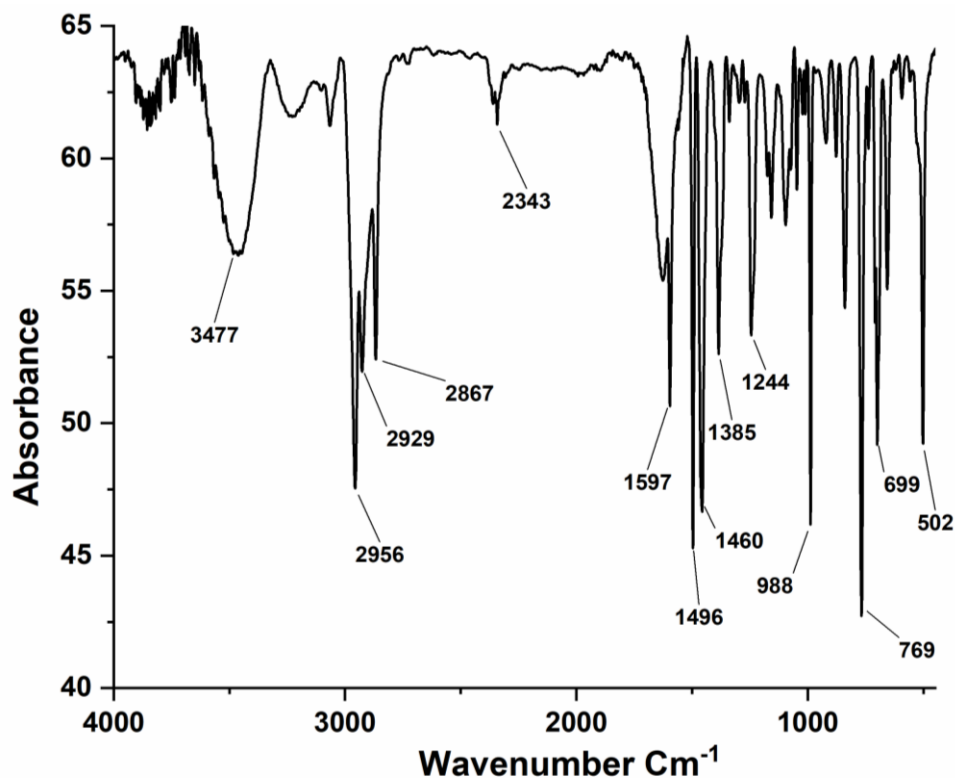

Fig. S40 FT-IR spectrum of **7**.

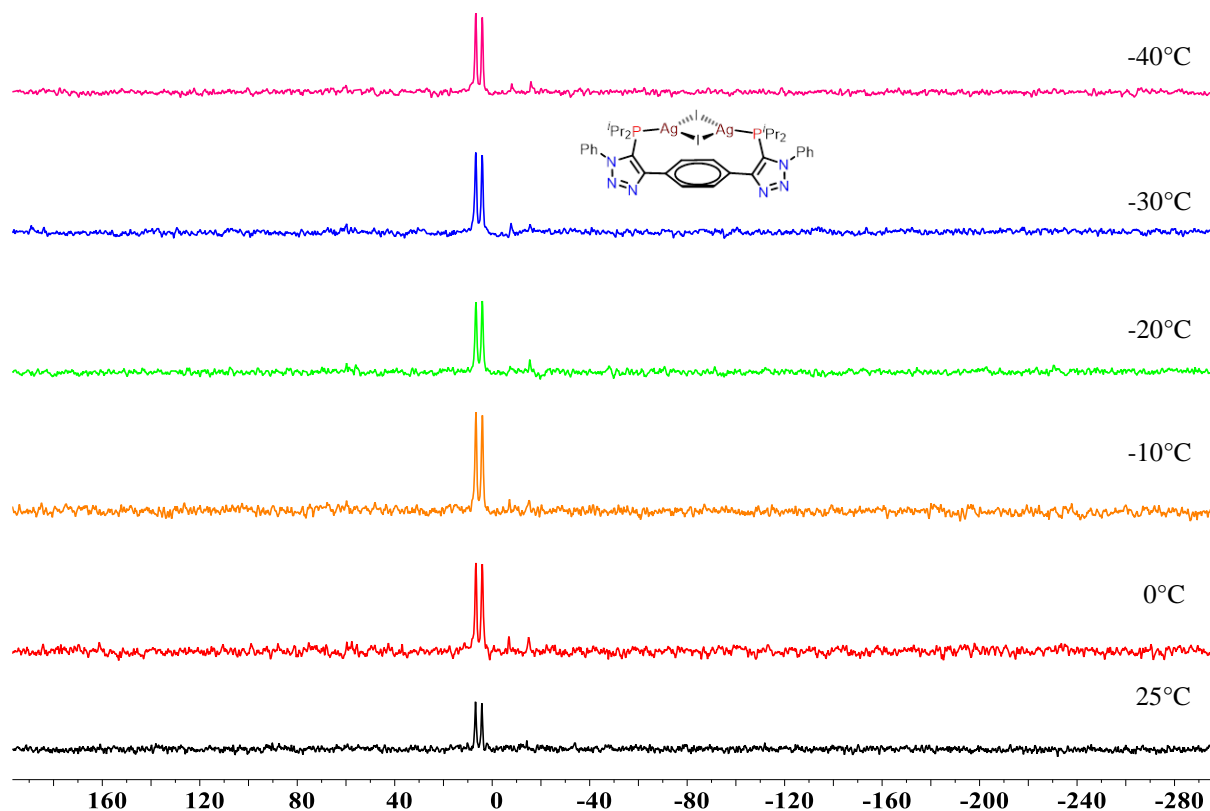

Fig. S41  $^{31}\text{P}\{^1\text{H}\}$  VT NMR data for **8**.

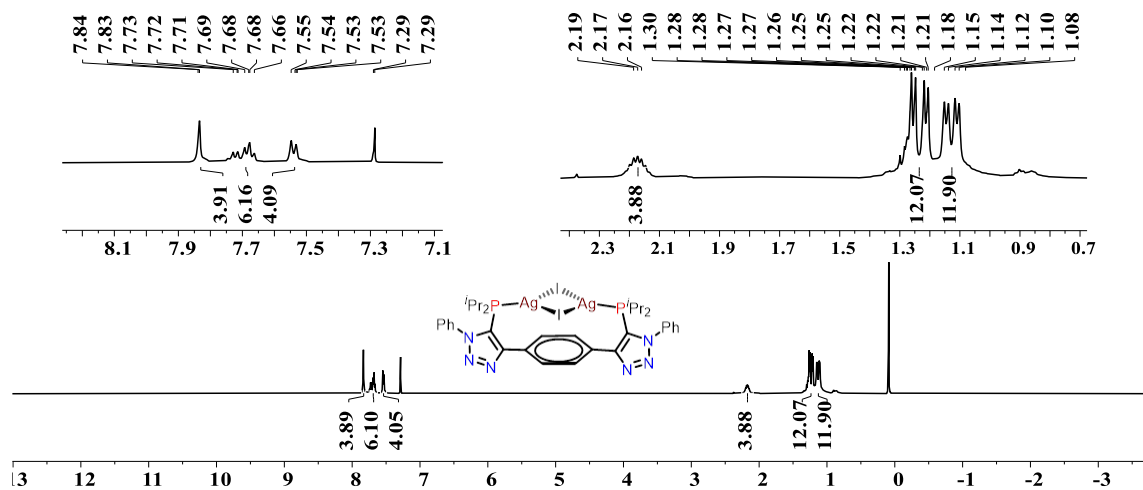

Fig. S42  $^1\text{H}$  NMR spectrum of **8** in  $\text{CDCl}_3$  (400 MHz).



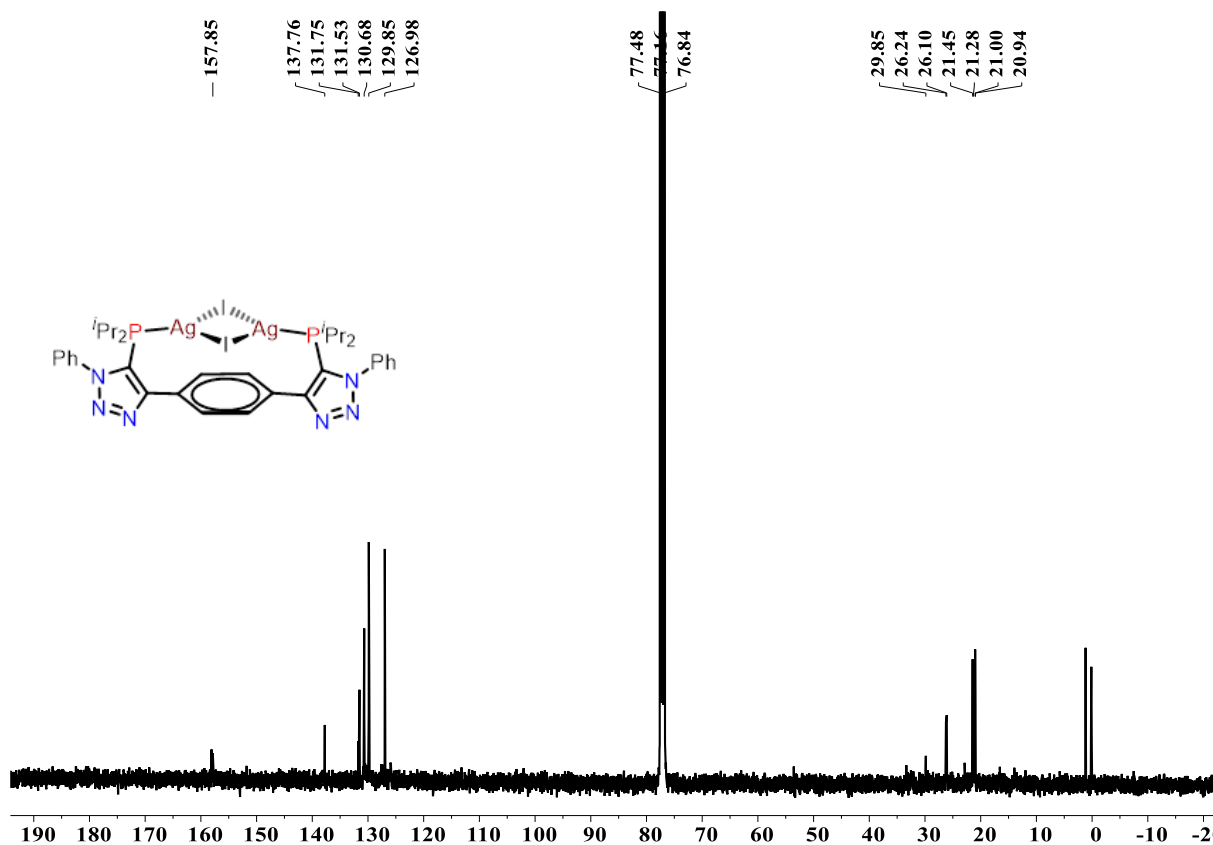

Fig. S43  $^{13}\text{C}\{^1\text{H}\}$  NMR spectrum of **8** in  $\text{CDCl}_3$  (101 MHz).

DEPARTMENT OF CHEMISTRY, I.I.T.(B)

Analysis Info

Analysis Name D:\Data\MAR-21\MSB-BK-BISPHOSPHINE-Agl-A.d  
 Method NaICsl\_pos\_1500hplc.m  
 Sample Name MSB-BK-BISPHOSPHINE-Agl-A  
 Comment C34H42Ag2I2P2N6

Acquisition Date 3/16/2021 9:39:53 AM

Operator AK IN  
 Instrument maXis impact 282001.00081

Acquisition Parameter

|             |            |                      |          |                  |           |
|-------------|------------|----------------------|----------|------------------|-----------|
| Source Type | ESI        | Ion Polarity         | Positive | Set Nebulizer    | 0.4 Bar   |
| Focus       | Not active | Set Capillary        | 3700 V   | Set Dry Heater   | 200 °C    |
| Scan Begin  | 50 m/z     | Set End Plate Offset | -500 V   | Set Dry Gas      | 6.0 l/min |
| Scan End    | 1500 m/z   | Set Charging Voltage | 2000 V   | Set Divert Valve | Source    |
|             |            | Set Corona           | 0 nA     | Set APCI Heater  | 0 °C      |

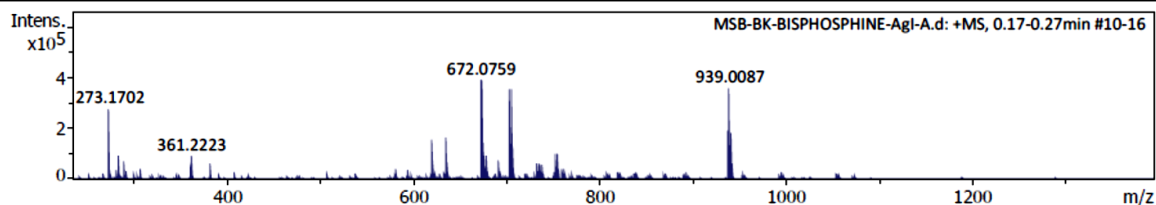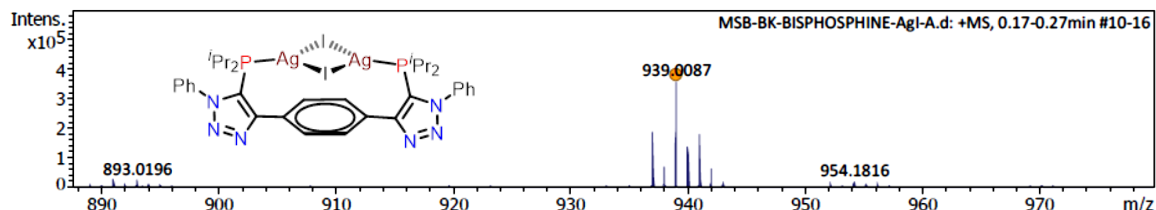

| Meas. m/z | # | Ion Formula    | m/z      | err [ppm] | mSigma | # mSigma | Score  | rdb  | e <sup>-</sup> Conf | N-Rule |
|-----------|---|----------------|----------|-----------|--------|----------|--------|------|---------------------|--------|
| 939.0087  | 1 | C34H42Ag2IN6P2 | 937.0087 | -0.1      | 8.1    | 1        | 100.00 | 22.0 | even                | ok     |

Fig. S44 HRMS spectrum of **8**.

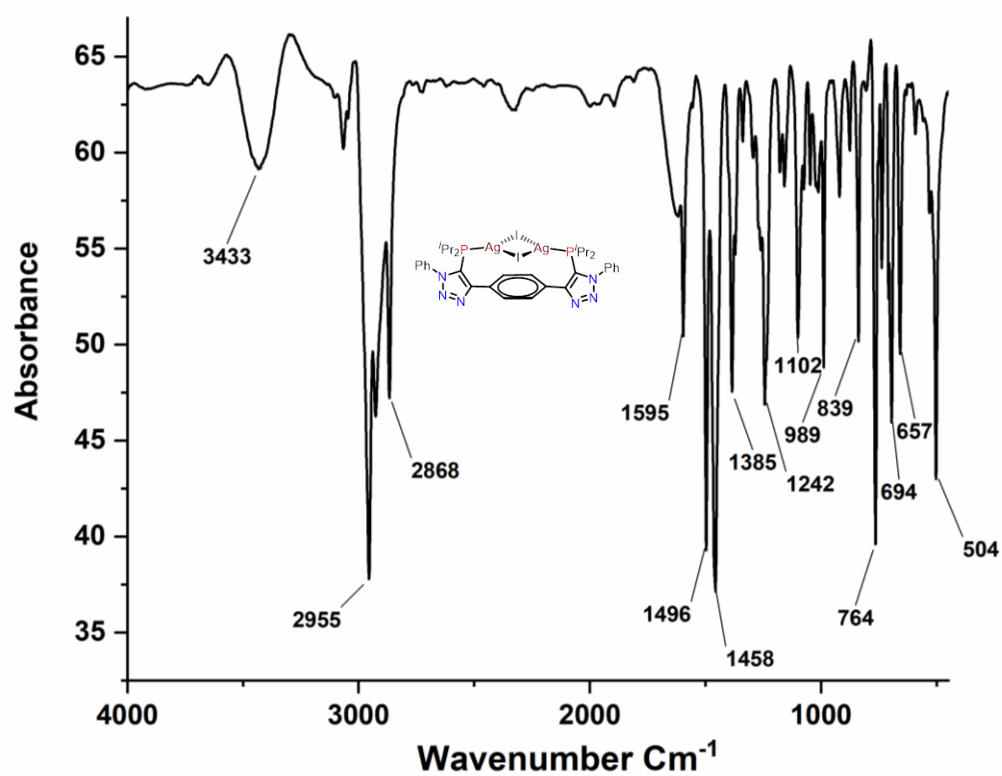

Fig. S45 FT-IR spectrum **8**.

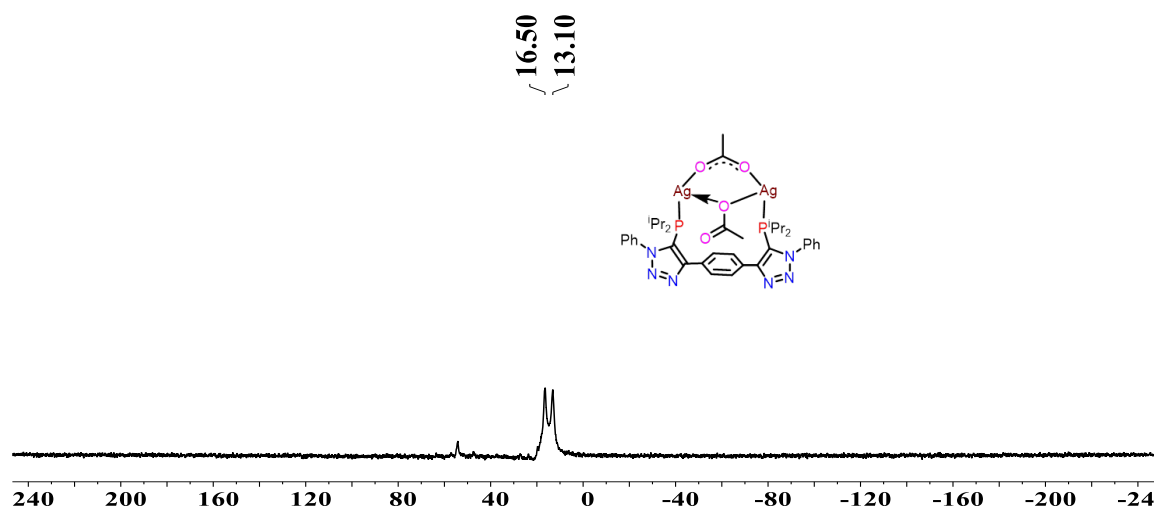

Fig. S46  $^{31}\text{P}\{^1\text{H}\}$  NMR spectrum of **9** in  $\text{CDCl}_3$  (162 MHz).

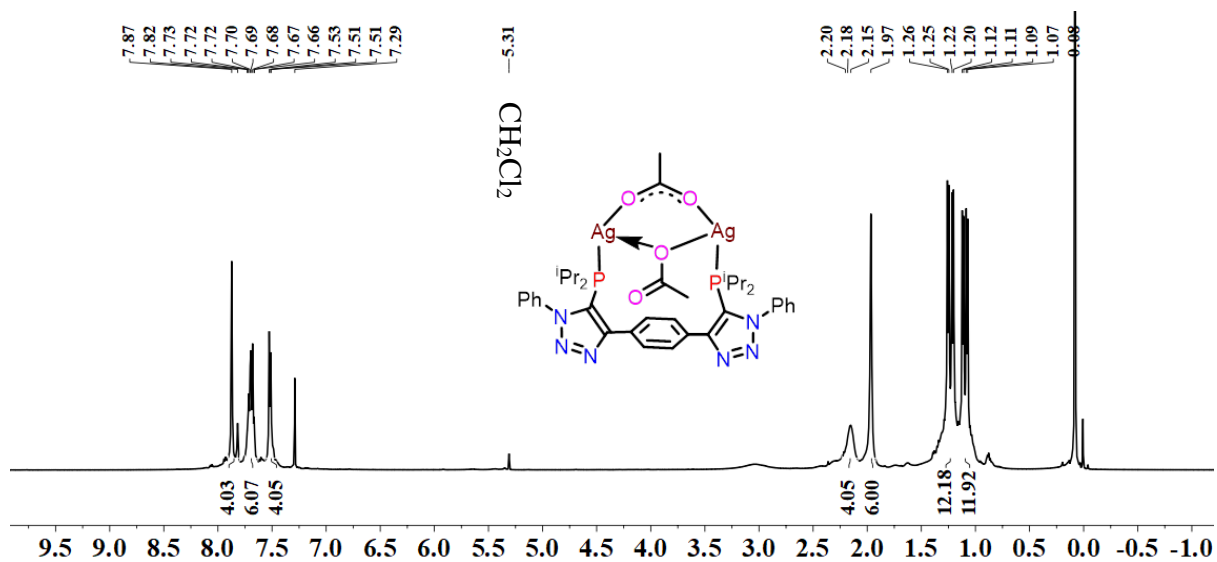

**Fig. S47**  $^1\text{H}$  NMR spectrum of **9** in  $\text{CDCl}_3$  (400 MHz).

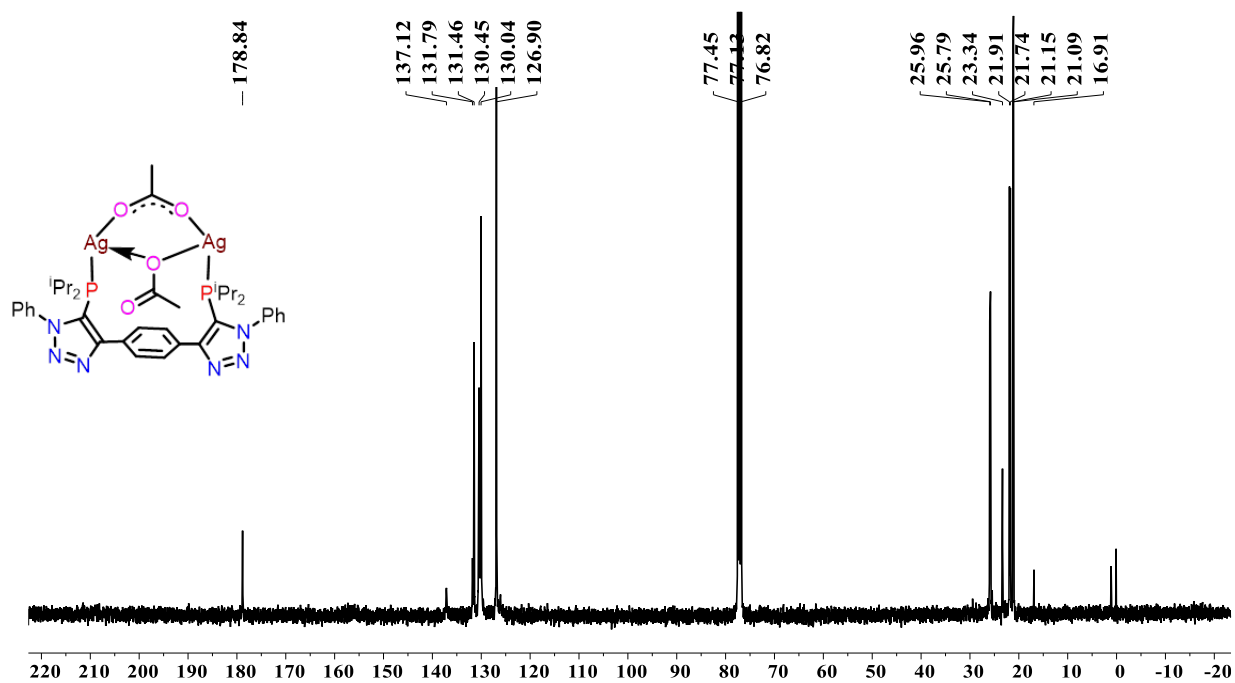

**Fig. S48**  $^{13}\text{C}\{^1\text{H}\}$  NMR spectrum of **9** in  $\text{CDCl}_3$  (101 MHz).

DEPARTMENT OF CHEMISTRY, I.I.T.(B)

|                      |                                          |                  |                           |  |
|----------------------|------------------------------------------|------------------|---------------------------|--|
| <b>Analysis Info</b> |                                          | Acquisition Date | 3/16/2021 10:07:18 AM     |  |
| Analysis Name        | D:\Data\MAR-21\MSB-BK-AgOAc-BRIDGING-B.d | Operator         | AK IN                     |  |
| Method               | NaICSI_pos_1500hplc.m                    | Instrument       | maXis impact 282001.00081 |  |
| Sample Name          | MSB-BK-AgOAc-BRIDGING-B                  |                  |                           |  |
| Comment              | C38H48Ag2P2N6O4                          |                  |                           |  |

|                              |            |                      |          |                  |           |
|------------------------------|------------|----------------------|----------|------------------|-----------|
| <b>Acquisition Parameter</b> |            |                      |          |                  |           |
| Source Type                  | ESI        | Ion Polarity         | Positive | Set Nebulizer    | 0.4 Bar   |
| Focus                        | Not active | Set Capillary        | 3700 V   | Set Dry Heater   | 200 °C    |
| Scan Begin                   | 50 m/z     | Set End Plate Offset | -500 V   | Set Dry Gas      | 6.0 l/min |
| Scan End                     | 1500 m/z   | Set Charging Voltage | 2000 V   | Set Divert Valve | Source    |
|                              |            | Set Corona           | 0 nA     | Set APCI Heater  | 0 °C      |

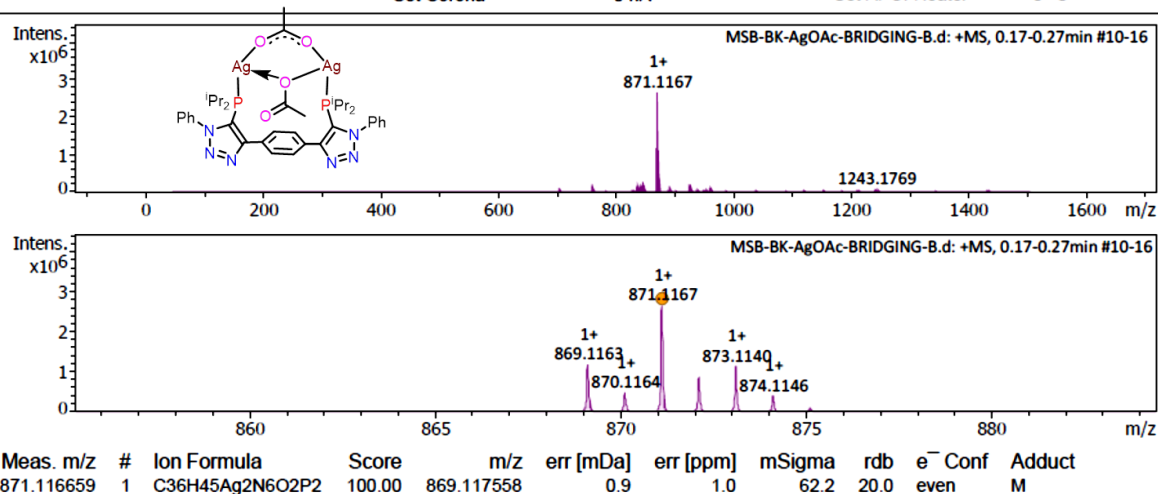

**Fig. S49** HRMS spectrum of **9**.

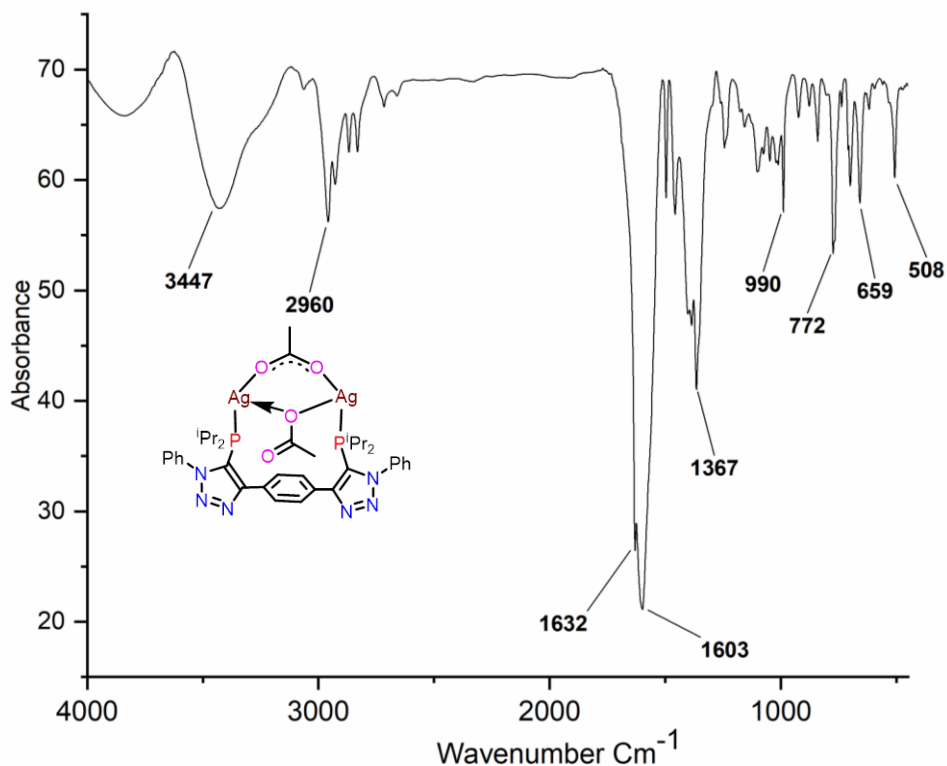

**Fig. S50** FT-IR spectrum of **9**.

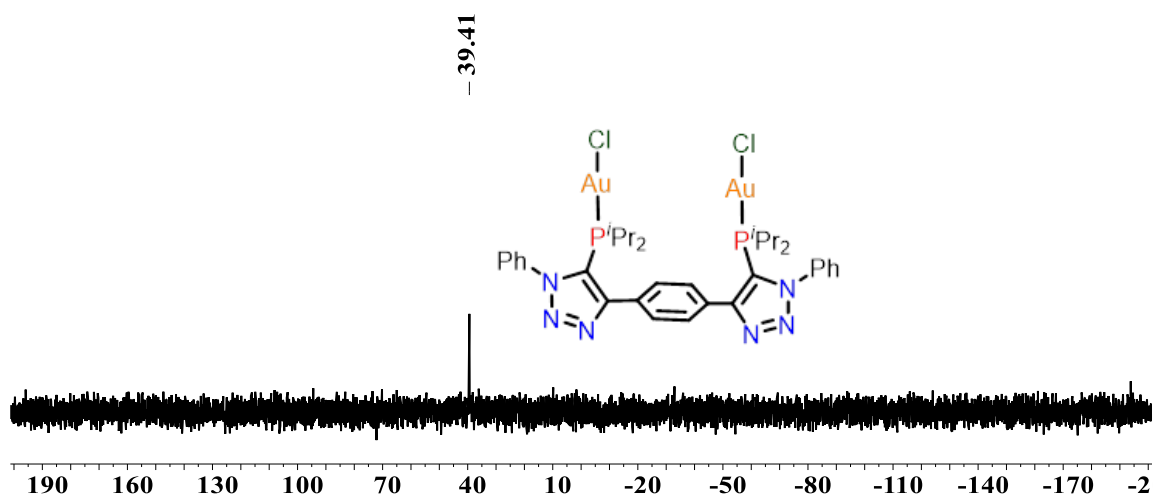

**Fig. S51**  $^{31}\text{P}\{^1\text{H}\}$  NMR spectrum of **10** in  $\text{CDCl}_3$  (162 MHz).

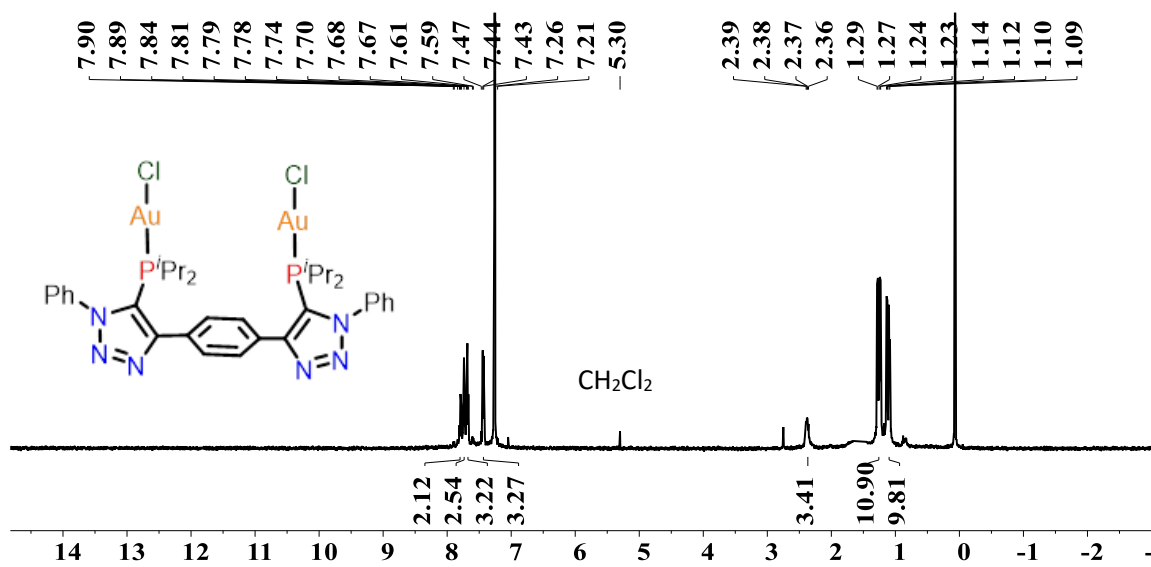

**Fig. S52**  $^1\text{H}$  NMR spectrum of **10** in  $\text{CDCl}_3$  (400 MHz).

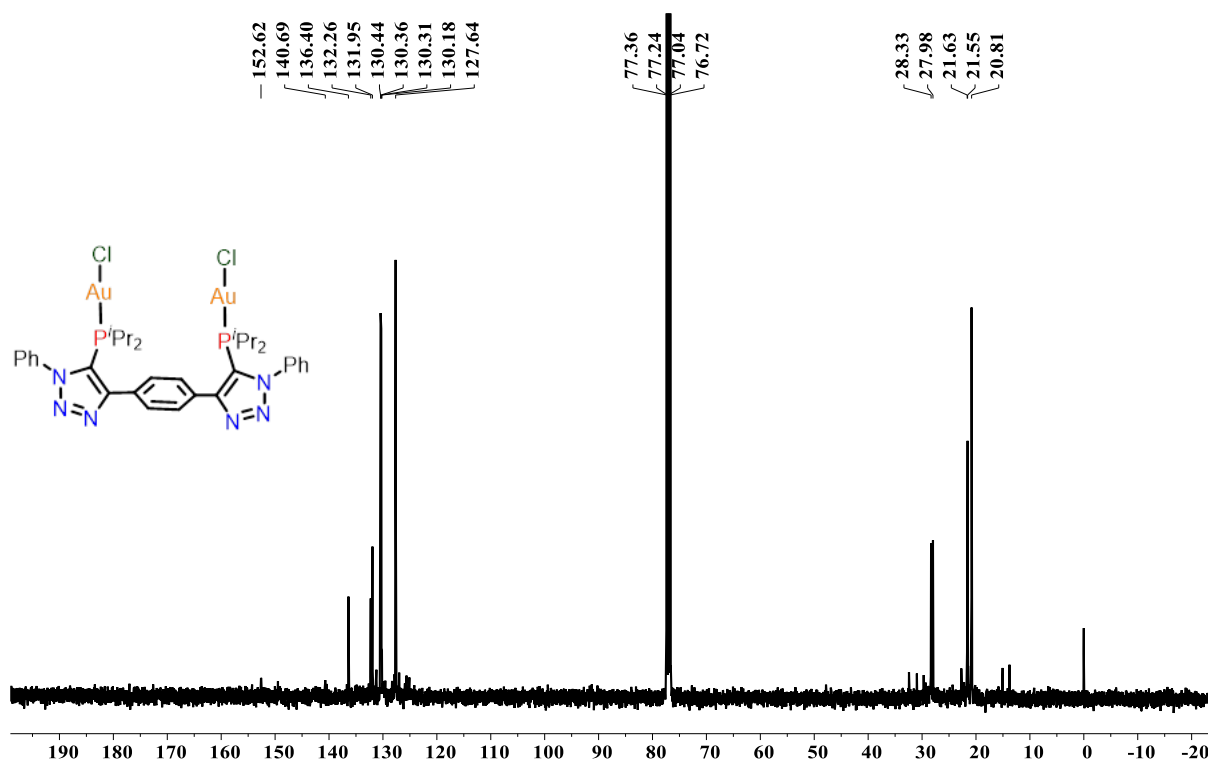

**Fig. S53**  $^{13}\text{C}\{^1\text{H}\}$  NMR spectrum of **10** in  $\text{CDCl}_3$  (101 MHz).

DEPARTMENT OF CHEMISTRY, I.I.T.(B)

**Analysis Info**

Analysis Name D:\Data\JULY-19\MSB-BK-142-Au.d  
 Method Tune\_pos\_NAICSI-2000A.m  
 Sample Name MSB-BK-142-Au  
 Comment C34H42Au2Cl2IN6P2

Acquisition Date 7/30/2019 1:41:50 AM  
 Operator MSB-SS OUT  
 Instrument maXis impact 282001.00081

**Acquisition Parameter**

|             |          |                       |            |                  |           |
|-------------|----------|-----------------------|------------|------------------|-----------|
| Source Type | ESI      | Ion Polarity          | Positive   | Set Nebulizer    | 0.3 Bar   |
| Focus       | Active   | Set Capillary         | 3700 V     | Set Dry Heater   | 180 °C    |
| Scan Begin  | 50 m/z   | Set End Plate Offset  | -500 V     | Set Dry Gas      | 4.0 l/min |
| Scan End    | 2000 m/z | Set Collision Cell RF | 2100.0 Vpp | Set Divert Valve | Source    |

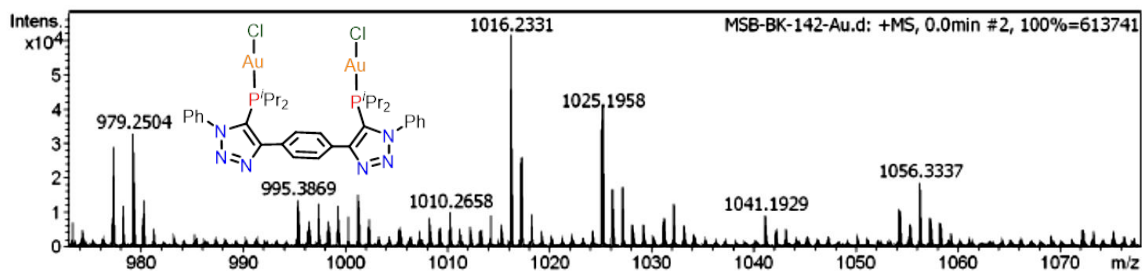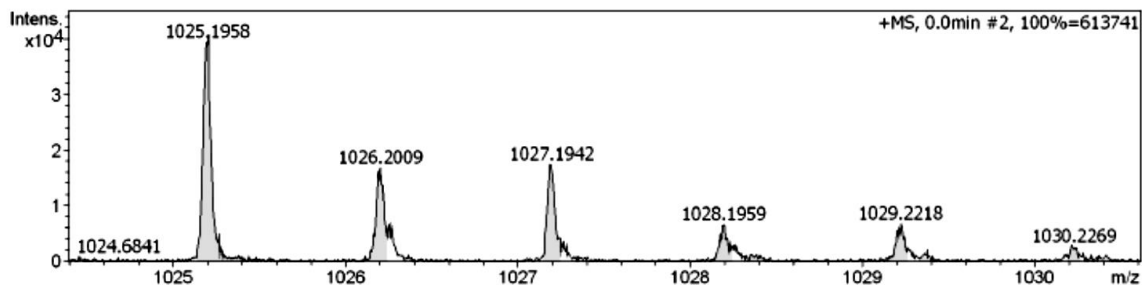

| Meas. m/z | # | Ion Formula       | m/z       | err [ppm] | mSigma | # Sigma | Score  | rdb  | e <sup>-</sup> Conf | N-Rule |
|-----------|---|-------------------|-----------|-----------|--------|---------|--------|------|---------------------|--------|
| 1025.1958 | 1 | C34H42Au2Cl2IN6P2 | 1025.1961 | -0.2      | 70.2   | 1       | 100.00 | 16.5 | even                | ok     |

Fig. S54 HRMS spectrum of 10.

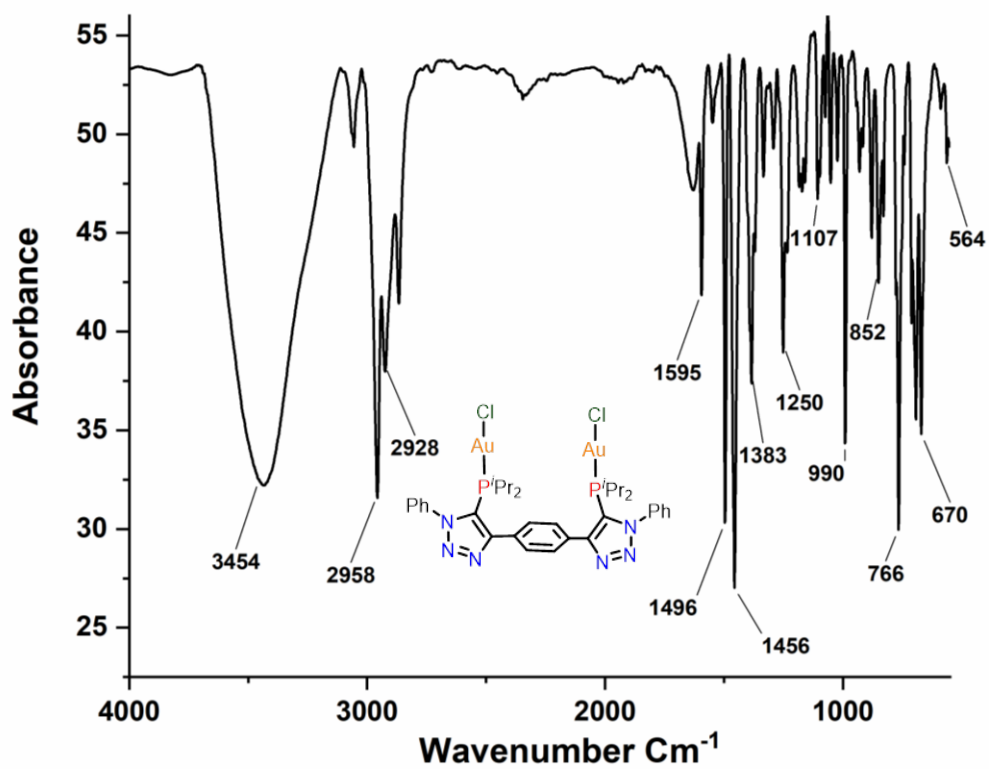

Fig. S55 FT-IR spectrum of 10.



**Table S1 Crystallographic information for compounds 2–5.**

|                                                 | <b>2</b>                                                      | <b>3·(CH<sub>2</sub>Cl<sub>2</sub>)</b>                                                       | <b>4</b>                                                                                      | <b>5·1.334(CH<sub>2</sub>Cl<sub>2</sub>)</b>                                                                             |
|-------------------------------------------------|---------------------------------------------------------------|-----------------------------------------------------------------------------------------------|-----------------------------------------------------------------------------------------------|--------------------------------------------------------------------------------------------------------------------------|
| Formula                                         | C <sub>34</sub> H <sub>42</sub> N <sub>6</sub> P <sub>2</sub> | C <sub>35</sub> H <sub>44</sub> Cl <sub>4</sub> Cu <sub>2</sub> N <sub>6</sub> P <sub>2</sub> | C <sub>34</sub> H <sub>42</sub> Br <sub>2</sub> Cu <sub>2</sub> N <sub>6</sub> P <sub>2</sub> | C <sub>35.33</sub> H <sub>44.67</sub> Cl <sub>2.86</sub> Cu <sub>2</sub> I <sub>1.81</sub> N <sub>6</sub> P <sub>2</sub> |
| Formula Weight                                  | 596.67                                                        | 879.58                                                                                        | 883.57                                                                                        | 1073.66                                                                                                                  |
| Crystal System                                  | triclinic                                                     | monoclinic                                                                                    | monoclinic                                                                                    | orthorhombic                                                                                                             |
| Space group                                     | P-1                                                           | P2 <sub>1</sub> /n                                                                            | P2 <sub>1</sub> /c                                                                            | Pbca                                                                                                                     |
| <i>a</i> , Å                                    | 9.4624(9)                                                     | 12.1164(3)                                                                                    | 10.3774(7)                                                                                    | 19.0847(3)                                                                                                               |
| <i>b</i> , Å                                    | 9.4943(9)                                                     | 12.6359(3)                                                                                    | 13.1298(5)                                                                                    | 16.9234(2)                                                                                                               |
| <i>c</i> , Å                                    | 10.6255(9)                                                    | 26.3943(7)                                                                                    | 27.1445(13)                                                                                   | 26.5829(4)                                                                                                               |
| <i>α</i> , deg                                  | 79.746(7)                                                     | 90                                                                                            | 90                                                                                            | 90                                                                                                                       |
| <i>β</i> , deg                                  | 73.045(8)                                                     | 102.446(3)                                                                                    | 100.700(6)                                                                                    | 90                                                                                                                       |
| <i>γ</i> , deg                                  | 61.024(9)                                                     | 90                                                                                            | 90                                                                                            | 90                                                                                                                       |
| <i>V</i> , Å <sup>3</sup>                       | 798.03(15)                                                    | 3946.06(17)                                                                                   | 3634.2(3)                                                                                     | 8585.7(2)                                                                                                                |
| <i>Z</i>                                        | 1                                                             | 4                                                                                             | 4                                                                                             | 8                                                                                                                        |
| <i>ρ</i> <sub>calc.</sub> (g cm <sup>-3</sup> ) | 1.242                                                         | 1.481                                                                                         | 1.615                                                                                         | 1.513                                                                                                                    |
| <i>μ</i> (Mo Kα), mm <sup>-1</sup>              | 0.170                                                         | 1.464                                                                                         | 3.491                                                                                         | 2.532                                                                                                                    |
| <i>F</i> (000)                                  | 318.0                                                         | 1808.0                                                                                        | 1784.0                                                                                        | 3856.0                                                                                                                   |
| crystal size, mm                                | 0.123 × 0.08 × 0.068                                          | 0.250 × 0.105 × 0.085                                                                         | 0.19 × 0.11 × 0.09                                                                            | 0.125 × 0.118 × 0.075                                                                                                    |
| <i>T</i> (K)                                    | 150                                                           | 150                                                                                           | 150                                                                                           | 150                                                                                                                      |
| 2 <i>θ</i> range, deg                           | 5.068 to 49.992                                               | 2.358 to 31.0145°                                                                             | 4.556 to 49.994                                                                               | 3.065 to 31.208                                                                                                          |
| Total no. reflns                                | 7245                                                          | 29108                                                                                         | 29523                                                                                         | 223620                                                                                                                   |
| No. of indep reflns                             | 2789 [R <sub>int</sub> = 0.0738]                              | 6918 [R <sub>int</sub> = 0.0963]                                                              | 6393 [R <sub>int</sub> = 0.1138]                                                              | 13598 [R <sub>int</sub> = 0.0888]                                                                                        |
| <i>S</i>                                        | 1.052                                                         | 1.054                                                                                         | 1.101                                                                                         | 1.063                                                                                                                    |
| <i>R</i> <sub>1</sub>                           | 0.0701                                                        | 0.0390                                                                                        | 0.0863                                                                                        | 0.0474                                                                                                                   |
| <i>wR</i> <sub>2</sub>                          | 0.1835                                                        | 0.0966                                                                                        | 0.1842                                                                                        | 0.1167                                                                                                                   |

**Table S2. Crystallographic information for compounds 7–10.**

|                                          | <b>7</b> ·3(CH <sub>2</sub> Cl <sub>2</sub> )                                                                  | <b>8</b> ·(C <sub>2</sub> H <sub>4</sub> Cl <sub>2</sub> )                                                   | <b>9</b> ·0.66(CHCl <sub>3</sub> ), 2.34(CH <sub>2</sub> Cl <sub>2</sub> )                                         | <b>10</b> ·(CH <sub>2</sub> Cl <sub>2</sub> )                                                 |
|------------------------------------------|----------------------------------------------------------------------------------------------------------------|--------------------------------------------------------------------------------------------------------------|--------------------------------------------------------------------------------------------------------------------|-----------------------------------------------------------------------------------------------|
| Empirical formula                        | C <sub>71</sub> H <sub>90</sub> Ag <sub>4</sub> Br <sub>4</sub> Cl <sub>6</sub> N <sub>12</sub> P <sub>4</sub> | C <sub>36</sub> H <sub>46</sub> Ag <sub>2</sub> Cl <sub>2</sub> I <sub>2</sub> N <sub>6</sub> P <sub>2</sub> | C <sub>41</sub> H <sub>53.34</sub> Ag <sub>2</sub> Cl <sub>6.66</sub> N <sub>6</sub> O <sub>4</sub> P <sub>2</sub> | C <sub>35</sub> H <sub>44</sub> Au <sub>2</sub> Cl <sub>4</sub> N <sub>6</sub> P <sub>2</sub> |
| Formula weight                           | 2199.24                                                                                                        | 1065.17                                                                                                      | 1208.056                                                                                                           | 1146.43                                                                                       |
| Crystal system                           | triclinic                                                                                                      | orthorhombic                                                                                                 | triclinic                                                                                                          | monoclinic                                                                                    |
| Space group                              | P-1                                                                                                            | Pbca                                                                                                         | P-1                                                                                                                | P2 <sub>1</sub> /c                                                                            |
| a/Å                                      | 13.3674(4)                                                                                                     | 18.9149(5)                                                                                                   | 12.6903(3)                                                                                                         | 9.2017(2)                                                                                     |
| b/Å                                      | 17.7306(8)                                                                                                     | 17.4523(5)                                                                                                   | 13.7105(3)                                                                                                         | 32.7903(6)                                                                                    |
| c/Å                                      | 20.2898(6)                                                                                                     | 26.6732(7)                                                                                                   | 16.3337(4)                                                                                                         | 13.2599(3)                                                                                    |
| α/°                                      | 83.651(3)                                                                                                      | 90                                                                                                           | 67.733(2)                                                                                                          | 90                                                                                            |
| β/°                                      | 74.880(3)                                                                                                      | 90                                                                                                           | 85.412(2)                                                                                                          | 98.888(2)                                                                                     |
| γ/°                                      | 70.200(3)                                                                                                      | 90                                                                                                           | 75.516(2)                                                                                                          | 90                                                                                            |
| Volume/Å <sup>3</sup>                    | 4366.7(3)                                                                                                      | 8805.0(4)                                                                                                    | 2546.05(11)                                                                                                        | 3952.82(15)                                                                                   |
| Z                                        | 2                                                                                                              | 8                                                                                                            | 2                                                                                                                  | 4                                                                                             |
| ρ <sub>calc.</sub> (g cm <sup>-3</sup> ) | 1.673                                                                                                          | 1.758                                                                                                        | 1.576                                                                                                              | 1.926                                                                                         |
| μ (Mo Kα), mm <sup>-1</sup>              | 3.016                                                                                                          | 2.518                                                                                                        | 1.226                                                                                                              | 7.800                                                                                         |
| F(000)                                   | 2182.0                                                                                                         | 4544                                                                                                         | 1220.05                                                                                                            | 2208.0                                                                                        |
| Size                                     | 0.123 × 0.023 × 0.012                                                                                          | 0.103 × 0.078 × 0.075                                                                                        | 0.123 × 0.053 × 0.024                                                                                              | 0.089 × 0.067 × 0.065                                                                         |
| T (K)                                    | 150                                                                                                            | 150                                                                                                          | 150                                                                                                                | 150                                                                                           |
| 2θ range, deg                            | 3.438 to 49.998                                                                                                | 3.524 to 145.528                                                                                             | 4.086 to 50                                                                                                        | 3.348 to 53.996                                                                               |
| Reflections collected                    | 168363                                                                                                         | 97689                                                                                                        | 142218                                                                                                             | 119124                                                                                        |
| Independent reflections                  | 15366 [R <sub>int</sub> = 0.1353]                                                                              | 7751 [R <sub>int</sub> = 0.0833]                                                                             | 8975 [R <sub>int</sub> = 0.1213]                                                                                   | 8615 [R <sub>int</sub> = 0.0832]                                                              |
| S                                        | 1.021                                                                                                          | 1.035                                                                                                        | 1.046                                                                                                              | 1.018                                                                                         |
| R <sub>I</sub> <sup>a</sup>              | 0.0778                                                                                                         | 0.0363                                                                                                       | 0.0458                                                                                                             | 0.0358                                                                                        |
| wR <sub>2</sub>                          | 0.2249                                                                                                         | 0.0931                                                                                                       | 0.1223                                                                                                             | 0.0889                                                                                        |

**Table S3. Important bond distances in the Cu(I) complexes (3–5) as obtained from the X-ray crystal structure and DFT optimization (wb97xd/Def2SVP). All distances in Å.**

| System               | Cu1–P1 | Cu2–P2 | C1–C2  | Cu1–C2 | Cu2–C1 | Cu1–Cu2 |
|----------------------|--------|--------|--------|--------|--------|---------|
| Complex 3<br>(found) | 2.1757 | 2.1835 | 1.391  | 2.950  | 2.746  | 2.7617  |
| Complex 3<br>(calc.) | 2.1761 | 2.1835 | 1.3896 | 2.9298 | 2.7661 | 2.7615  |
| Complex 4<br>(found) | 2.191  | 2.207  | 1.407  | 2.794  | 2.640  | 2.7036  |
| Complex 4<br>(calc.) | 2.1913 | 2.2065 | 1.4076 | 2.7987 | 2.6398 | 2.7035  |
| Complex 5<br>(found) | 2.2244 | 2.2245 | 1.402  | 2.856  | 2.852  | 2.8316  |
| Complex 5<br>(calc.) | 2.2246 | 2.2243 | 1.4029 | 2.8518 | 2.856  | 2.8315  |

**Table S4. Selected topological properties of complexes 3, 4, and 5.**

| Complex | $\rho(r)$ | $\lambda_2$ | $\nabla^2 \rho(r)$ | G(r)   |
|---------|-----------|-------------|--------------------|--------|
| 3-BCP-1 | 0.0133    | -0.0065     | 0.0322             | 0.0083 |
| 3-BCP-2 | 0.0175    | -0.0100     | 0.0479             | 0.0121 |
| 4-BCP-1 | 0.0166    | -0.0084     | 0.0444             | 0.0112 |
| 4-BCP-2 | 0.0220    | -0.0139     | 0.06f              | 0.0167 |
| 5-BCP-1 | 0.0159    | -0.0073     | 0.0382             | 0.0100 |
| 5-BCP-2 | 0.0159    | -0.0078     | 0.0387             | 0.0101 |
